# Supplementary material for: Vapor phase deposition of perovskite photovoltaics: short track to commercialization?
Source: Royal Society of Chemistry journal article supplement (doi:10.1039/d3ee03273f), 2024-01-01
Supplement: d3ee03273f1.pdf [file d3ee03273f1.pdf]

## Supporting Information

# Vapor Phase Deposition of Perovskite Photovoltaics: Short Track to Commercialization?

Tobias Abzieher<sup>1,\*</sup>, David T. Moore<sup>1,\*</sup>, Marcel Roß<sup>2</sup>, Steve Albrecht<sup>2</sup>, Jared Silvia<sup>3</sup>, Hairan Tan<sup>4</sup>, Quentin Jean-gros<sup>5</sup>, Christophe Ballif<sup>5,6</sup>, Maximilian T. Hoerantner<sup>7</sup>, Beom-Soo Kim<sup>8</sup>, Henk J. Bolink<sup>9</sup>, Paul Pistor<sup>10,11</sup>, Jan Christoph Goldschmidt<sup>12</sup>, Yu-Hsien Chiang<sup>13,14</sup>, Samuel D. Stranks<sup>13,14</sup>, Juliane Borchert<sup>15,16</sup>, Michael D. McGehee<sup>17</sup>, Monica Morales-Masis<sup>18</sup>, Jay B. Patel<sup>19</sup>, Annalisa Bruno<sup>20</sup>, and Ulrich W. Paetzold<sup>21,\*</sup>

<sup>1</sup>National Renewable Energy Laboratory (NREL), Golden, CO, USA. <sup>2</sup>Helmholtz Zentrum Berlin (HZB), Berlin, Germany. <sup>3</sup>BlueDot Photonics Inc., Seattle, WA, USA. <sup>4</sup>Nanjing University, Nanjing, China. <sup>5</sup>Centre Suisse d'Electronique et de Microtechnique (CSEM), Neuchâtel, Switzerland. <sup>6</sup>École Polytechnique Fédérale de Lausanne (EPFL), Institute of Electrical and Micro Engineering (IEM), Photovoltaics and Thin-Film Electronics Laboratory, Neuchâtel, Switzerland. <sup>7</sup>Swift Solar, San Carlos, CA, USA. <sup>8</sup>Korea Research Institute of Chemical Technology (KRICT), Daejeon, Republic of Korea. <sup>9</sup>Universitat de València, València, Spain. <sup>10</sup>Martin-Luther-University Halle-Wittenberg, Halle, Germany. <sup>11</sup>Universidad Pablo de Olavide (UPO), Seville, Spain. <sup>12</sup>Philipps-University Marburg, Marburg, Germany. <sup>13</sup>Department of Chemical Engineering and Biotechnology, University of Cambridge, Cambridge, UK. <sup>14</sup>Department of Physics, University of Cambridge, Cambridge, UK. <sup>15</sup>Fraunhofer Institute for Solar Energy Systems, Freiburg, Germany. <sup>16</sup>University of Freiburg, INATECH, Freiburg, Germany. <sup>17</sup>University of Colorado Boulder, Boulder, CO, USA. <sup>18</sup>MESA+ Institute for Nanotechnology, University of Twente, Enschede, The Netherlands. <sup>19</sup>Department of Physics, King's College London, London, UK. <sup>20</sup>Nanyang Technological University, Singapore, Singapore. <sup>21</sup>Karlsruhe Institute of Technology (KIT), Karlsruhe, Germany.

\*corresponding authors: [tobias.abzieher@gmail.com](mailto:tobias.abzieher@gmail.com), [david.moore@nrel.gov](mailto:david.moore@nrel.gov), [ulrich.paetzold@kit.edu](mailto:ulrich.paetzold@kit.edu)

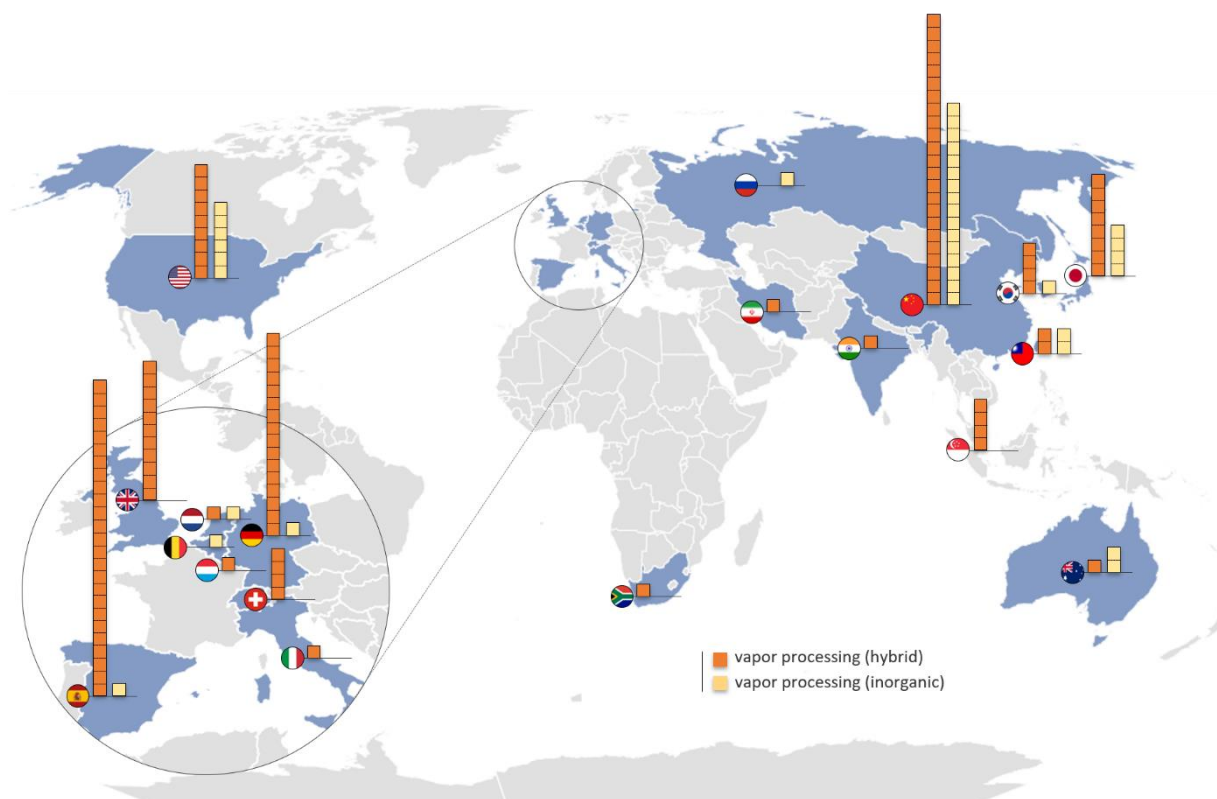

**Fig. S1 | Global academic activities in the field of vapor-processed perovskite PV.** Geographical distribution of authors of research articles with a focus on the fabrication of vapor processed hybrid (orange) and inorganic (yellow) perovskite materials for solar cell applications. The country of origin is defined based on the main affiliation of the first author each publication. A summary of the considered research studies is provided in Table S3 and Table S4 in the Supporting Information.

## Methodology of Techno-Economic Analysis

This section describes the logic of our bottom-up techno-economic analysis of manufacturing costs for the vapor processed absorber layer of perovskite photovoltaics at industrial scale. A realistic cost-of-ownership model was created by one of the involved industrial partners of this work. The model calculated an annual cost for six categories: equipment, building and facilities, maintenance, utilities, labor, and materials and consumables. Unit costs ( $\text{\$ m}^{-2}$ ,  $\text{\$ W}^{-1}$ ,  $\text{\$ per module}$ ) were calculated based on annual tool and factory throughput. The final device was assumed to have a perovskite absorber layer thickness of 500 nm, a power conversion efficiency of 16%, and was fabricated with an annual production capacity of 2 GW. We note that the assumed efficiency is considered low compared to recent record devices reported in literature. As a consequence, the total costs calculated here are rather conservative. Deposition profiles from vapor sources were based on vapor flux modeling results. Deposition tool assumptions (e.g., capital costs, footprints, utility demands) were collected from interviews with tooling manufacturers and engineers with experience in tool design and operations. Deposition tool uptime was assumed to be 92% after accounting for routine maintenance and servicing on a bi-weekly cadence and 400 hours of unplanned downtime per year. Tool throughput was calculated based on deposition rate, the number of modules ran in parallel on the same tool, and the number of deposition sources installed serially. Material unit costs were assumed to decrease in a non-linear fashion with the increasing scale of consumption, with a 50% reduction in cost achieved with each order of magnitude increase. The starting material unit costs were collected from quotes from commercial vendors. Facilities, utilities, and labor costs were collected from surveys of real-world examples for production facilities in Grant County, Washington, USA. Capital equipment costs were assumed to depreciate over seven years. A summary of the employed variables and their sources can be found in **Table S1**. It needs to be noted that there are several unknowns in the original report of NREL used to estimate the production costs of solution processing, which add uncertainties to the cost comparison between solution and vapor processing. However, we note that most assumptions are rather conservative to avoid an over-optimistic viewpoint on vapor phase deposition. The key assumptions are:

**Production yield:** The yield used for the case of solution processing is 96%, which the original report by NREL notes is hypothetical as there are no commercial solution-based manufacturers in full production to establish this metric. According to the employed survey performed in this work, typical yields for vapor processes are 90% at a minimum and typically rather above 96% depending on the complexity of the process. So far, there are no reports the authors are aware

of that boast yields for large area deposition for solution processed perovskites to values above 90%. This item alone can increase the production costs for solution deposition dramatically as there is a direct relationship between yield and production costs.

**Material usage:** Material costs include both the precursor materials and solvents and are assumed to be equal for solution- and vapor processing in this work. This is considered a rather conservative estimation for vapor processing as there are no solvent employed and the material usage can, theoretically, be near 100% for certain processes based on the herein performed survey. Additionally, the use of solvents adds additional safety related disadvantages that can increase production costs of solution processing.

**Annealing processes:** Typical annealing processes for solution processed films are 20-60 minutes long, which would require multiple, parallel drying lines for each deposition line or a single, very long drying stage which is typically impractical as they negatively impact production costs. For certain vapor deposition processes (e.g., co-evaporation processes), post-annealing procedures are often reported to be irrelevant or only very short annealing processes (< 5 min) employed, potentially creating an additional cost benefit of vapor processing.

**Service life and recycling:** Although there are reports purporting vapor deposited films and devices as being more stable, the evidence is found to be limited as well as the total lifetimes far from commercial relevance. As such, differences in projected service life for the both methods have not been considered. In terms of recycling, only the active layer is with all other layers and processes being equivalent considered in this discussion. Therefore, the recycling of modules for either method should also be equivalent.

**Tab. S1 | Employed variables for the bottom-up techno-economic analysis of manufacturing costs for a vapor-processed perovskite absorber layer.** The table summarizes the key variables and the respective source used for the calculation of the production costs and capital expenditure (CAPEX) of a vapor-processed perovskite absorber as described in the main manuscript.

| variable                         | base assumption | source              |
|----------------------------------|-----------------|---------------------|
| absorber thickness               | 500 nm          | common device data  |
| capital cost for deposition tool | \$7,500,000     | expert interviews   |
| source nozzle diameter           | 5 mm            | vapor flux modeling |
| throw distance                   | 100 mm          | vapor flux modeling |
| nozzle spacing                   | 30 mm           | vapor flux modeling |
| module width                     | 1 m             | common device data  |
| module length                    | 2 m             | common device data  |
| Module efficiency                | 16%             | common device data  |

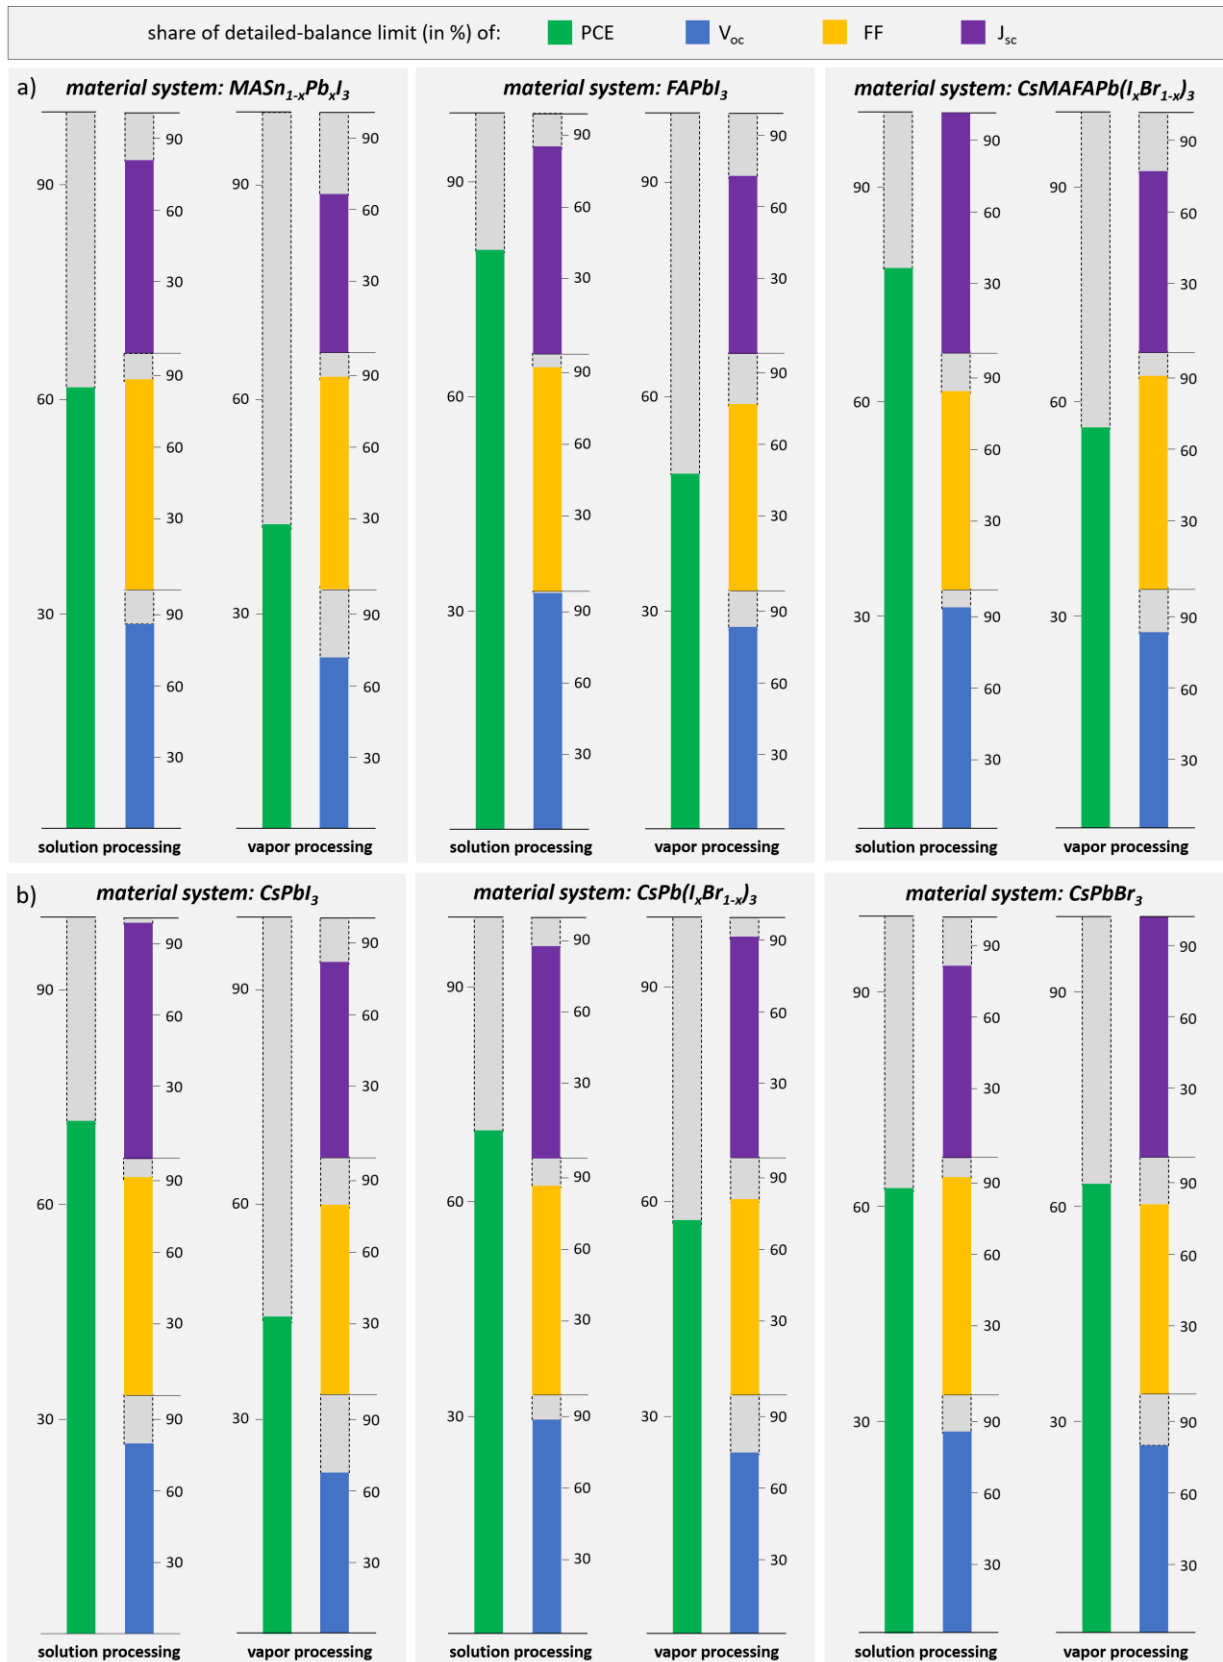

**Fig. S2 | Solar cell parameters of state-of-the-art vapor-processed perovskite-based solar cells.** Comparison of champion solar cells employing various hybrid (a) and inorganic (b) perovskite absorbers prepared by either solution- (left) or vapor-based (right) approaches with respect to the theoretical detailed balance of the individual solar cell parameters

**Tab. S2 | Literature overview of state-of-the-art vapor- and solution-processed perovskite-based solar cells.** This table summarizes the solar cell parameters of state-of-the-art vapor- and solution-processed perovskite solar cells used for the direct comparison in Figure 2 in the main manuscript and Figure S1 in the Supporting Information. Solar cell parameters shown here represent values extracted from the reverse  $J$ - $V$  scan.

| authors                     | year | absorber type | absorber composition                                                                                            | deposition approach | $E_g$ (eV) | PCE (%) | FF (%) | $V_{oc}$ (V) | $J_{sc}$ (mA cm <sup>-2</sup> ) | reference      |
|-----------------------------|------|---------------|-----------------------------------------------------------------------------------------------------------------|---------------------|------------|---------|--------|--------------|---------------------------------|----------------|
| Li <i>et al.</i>            | 2020 | hybrid        | Cs <sub>0.05</sub> MA <sub>0.1</sub> FA <sub>0.85</sub> Sn <sub>0.5</sub> Pb <sub>0.5</sub> I <sub>3</sub>      | solution-based      | 1.28       | 20.4    | 79.1   | 0.86         | 29.8                            | <sup>1</sup>   |
| Igual-Muñoz <i>et al.</i>   | 2020 | hybrid        | FAPb <sub>0.5</sub> Sn <sub>0.5</sub> I <sub>3</sub>                                                            | vapor-based         | 1.28       | 14.0    | 79.3   | 0.72         | 24.5                            | <sup>2</sup>   |
| Li <i>et al.</i>            | 2022 | hybrid        | MAPbI <sub>3</sub>                                                                                              | solution-based      | 1.55       | 22.1    | 81.8   | 1.13         | 24.0                            | <sup>3</sup>   |
| Pérez-del-Rey <i>et al.</i> | 2018 | hybrid        | MAPbI <sub>3</sub>                                                                                              | vapor-based         | 1.55       | 20.8    | 82.1   | 1.16         | 21.9                            | <sup>4</sup>   |
| Min <i>et al.</i>           | 2021 | hybrid        | FAPbI <sub>3</sub>                                                                                              | solution-based      | 1.48       | 25.8    | 84.9   | 1.18         | 25.8                            | <sup>5,6</sup> |
| Borchert <i>et al.</i>      | 2017 | hybrid        | FAPbI <sub>3</sub>                                                                                              | vapor-based         | 1.48       | 15.8    | 70.8   | 1.01         | 22.1                            | <sup>7</sup>   |
| Gharibzadeh <i>et al.</i>   | 2021 | hybrid        | Cs <sub>0.18</sub> FA <sub>0.82</sub> PbI <sub>3</sub>                                                          | solution-based      | 1.57       | 22.7    | 83.2   | 1.16         | 23.5                            | <sup>8</sup>   |
| Li <i>et al.</i>            | 2022 | hybrid        | Cs <sub>0.05</sub> FA <sub>0.95</sub> Pb(I <sub>1-x</sub> Cl <sub>x</sub> ) <sub>3</sub>                        | vapor-based         | 1.57       | 24.4    | 81.8   | 1.15         | 25.9                            | <sup>9</sup>   |
| Xu <i>et al.</i>            | 2022 | hybrid        | Cs <sub>0.22</sub> FA <sub>0.78</sub> Pb(I <sub>0.85</sub> Br <sub>0.15</sub> ) <sub>3</sub>                    | solution-based      | 1.68       | 19.5    | 78.7   | 1.20         | 20.7                            | <sup>10</sup>  |
| Chiang <i>et al.</i>        | 2023 | hybrid        | Cs <sub>0.30</sub> FA <sub>0.7</sub> Pb(I <sub>0.76</sub> Br <sub>0.24</sub> ) <sub>3</sub>                     | vapor-based         | 1.71       | 17.7    | 78.4   | 1.18         | 19.1                            | <sup>11</sup>  |
| Lou <i>et al.</i>           | 2021 | hybrid        | Cs <sub>0.05</sub> MA <sub>0.15</sub> FA <sub>0.80</sub> Pb(I <sub>0.85</sub> Br <sub>0.15</sub> ) <sub>3</sub> | solution-based      | 1.65       | 23.1    | 76.1   | 1.25         | 24.2                            | <sup>12</sup>  |
| Gil-Escrig <i>et al.</i>    | 2018 | hybrid        | Cs <sub>0.5</sub> MA <sub>0.1</sub> FA <sub>0.4</sub> Pb(I <sub>0.83</sub> Br <sub>0.17</sub> ) <sub>3</sub>    | vapor-based         | 1.70       | 16.0    | 82.0   | 1.15         | 17.0                            | <sup>13</sup>  |
| Wang <i>et al.</i>          | 2023 | inorganic     | CsPbI <sub>3</sub>                                                                                              | solution-based      | 1.73       | 20.2    | 84.0   | 1.13         | 21.4                            | <sup>14</sup>  |
| Becker <i>et al.</i>        | 2019 | inorganic     | CsPbI <sub>3</sub>                                                                                              | vapor-based         | 1.73       | 12.5    | 73.0   | 0.96         | 17.8                            | <sup>15</sup>  |

| authors                | year | absorber type | absorber composition                                     | deposition approach | $E_g$ (eV) | PCE (%) | FF (%) | $V_{oc}$ (V) | $J_{sc}$ (mA cm <sup>-2</sup> ) | reference     |
|------------------------|------|---------------|----------------------------------------------------------|---------------------|------------|---------|--------|--------------|---------------------------------|---------------|
| Guo <i>et al.</i>      | 2022 | inorganic     | CsPb(I <sub>0.67</sub> Br <sub>0.33</sub> ) <sub>3</sub> | solution-based      | 1.91       | 17.4    | 81.3   | 1.42         | 15.0                            | <sup>16</sup> |
| Abzieher <i>et al.</i> | 2023 | inorganic     | CsPb(I <sub>0.83</sub> Br <sub>0.17</sub> ) <sub>3</sub> | vapor-based         | 1.84       | 14.9    | 76.0   | 1.17         | 16.8                            | <sup>17</sup> |
| Duan <i>et al.</i>     | 2019 | inorganic     | CsPbBr <sub>3</sub>                                      | solution-based      | 2.25       | 10.8    | 85.5   | 1.62         | 7.8                             | <sup>18</sup> |
| Tong <i>et al.</i>     | 2019 | inorganic     | CsPbBr <sub>3</sub>                                      | vapor-based         | 2.25       | 10.9    | 74.5   | 1.50         | 9.8                             | <sup>19</sup> |

**Tab. S3 | Solar cell parameters and deposition rates of vapor-processed hybrid perovskite solar cells.** Only the champion device of the respective references is provided. The table only shows devices with accessible deposition rates. Solar cell parameters shown here represent values extracted from the reverse  $J$ - $V$  scan. Data is presented visually in Figure 3 in the main manuscript.

| authors                      | year | absorber composition                                 | deposition approach | deposition rate (nm min <sup>-1</sup> ) | source of rate | PCE (%) | FF (%) | V <sub>oc</sub> (V) | J <sub>sc</sub> (mA cm <sup>-2</sup> ) | reference |
|------------------------------|------|------------------------------------------------------|---------------------|-----------------------------------------|----------------|---------|--------|---------------------|----------------------------------------|-----------|
| Liu <i>et al.</i>            | 2013 | MAPb(I <sub>1-x</sub> Cl <sub>x</sub> ) <sub>3</sub> | co-evaporation      | 2.6                                     | in article     | 15.4    | 67.0   | 1.07                | 21.5                                   | 20        |
| Leyden <i>et al.</i>         | 2014 | MAPb(I <sub>1-x</sub> Cl <sub>x</sub> ) <sub>3</sub> | CVD                 | 2.4                                     | in article     | 11.8    | n/a    | n/a                 | n/a                                    | 21        |
| Chen <i>et al.</i>           | 2014 | MAPb(I <sub>1-x</sub> Cl <sub>x</sub> ) <sub>3</sub> | layer-by-layer      | 4.1                                     | from authors   | 15.4    | 72.2   | 1.02                | 20.9                                   | 22        |
| Ono <i>et al.</i>            | 2014 | MAPb(I <sub>1-x</sub> Cl <sub>x</sub> ) <sub>3</sub> | co-evaporation      | 4.2                                     | in article     | 9.9     | 53.5   | 1.09                | 17.0                                   | 23        |
| Roldán-Carmona <i>et al.</i> | 2014 | MAPbI <sub>3</sub>                                   | co-evaporation      | 4.3                                     | from authors   | 7.0     | 47.0   | 1.04                | 14.3                                   | 24        |
| Momblona <i>et al.</i>       | 2014 | MAPbI <sub>3</sub>                                   | co-evaporation      | 4.8                                     | from authors   | 12.7    | 63.0   | 1.07                | 18.8                                   | 25        |
| Malinkiewicz <i>et al.</i>   | 2014 | MAPbI <sub>3</sub>                                   | co-evaporation      | 4.8                                     | from authors   | 12.0    | 67.0   | 1.05                | 16.1                                   | 26        |
| Malinkiewicz <i>et al.</i>   | 2014 | MAPbI <sub>3</sub>                                   | co-evaporation      | 5.0                                     | from authors   | 14.8    | 75.0   | 1.09                | 18.2                                   | 27        |
| Polander <i>et al.</i>       | 2014 | MAPb(I <sub>1-x</sub> Cl <sub>x</sub> ) <sub>3</sub> | co-evaporation      | 5.6                                     | from authors   | 10.9    | 70.0   | 0.97                | 16.1                                   | 28        |
| Ng <i>et al.</i>             | 2014 | MAPb(I <sub>1-x</sub> Cl <sub>x</sub> ) <sub>3</sub> | co-evaporation      | 6.8                                     | from authors   | 6.1     | 60.0   | 0.82                | 12.5                                   | 29        |
| Subbiah <i>et al.</i>        | 2014 | MAPb(I <sub>1-x</sub> Cl <sub>x</sub> ) <sub>3</sub> | co-evaporation      | 10.4                                    | in article     | 7.3     | 75.0   | 0.94                | 14.9                                   | 30        |
| Hu <i>et al.</i>             | 2014 | MAPbI <sub>3</sub>                                   | layer-by-layer      | 11.7                                    | in article     | 5.4     | 50.0   | 0.80                | 13.6                                   | 31        |
| Gao <i>et al.</i>            | 2015 | MAPb(I <sub>1-x</sub> Cl <sub>x</sub> ) <sub>3</sub> | co-evaporation      | n/a                                     | n/a            | 10.3    | 63.0   | 0.97                | 17.3                                   | 32        |
| Ke <i>et al.</i>             | 2015 | MAPbI <sub>3</sub>                                   | co-evaporation      | n/a                                     | n/a            | 15.4    | 77.5   | 1.04                | 19.1                                   | 33        |
| Lin <i>et al.</i>            | 2015 | MAPbI <sub>3</sub>                                   | co-evaporation      | n/a                                     | n/a            | 16.5    | 72.0   | 1.05                | 21.9                                   | 34        |
| Abbas <i>et al.</i>          | 2015 | MAPbI <sub>3</sub>                                   | layer-by-layer      | 1.9                                     | in article     | 13.7    | 65.3   | 0.96                | 21.8                                   | 35        |
| Teuscher <i>et al.</i>       | 2015 | MAPbI <sub>3</sub>                                   | co-evaporation      | 1.9                                     | in article     | 12.5    | n/a    | n/a                 | n/a                                    | 36        |

| authors                | year | absorber composition                                 | deposition approach                    | deposition rate (nm min <sup>-1</sup> ) | source of rate | PCE (%) | FF (%) | V <sub>oc</sub> (V) | J <sub>sc</sub> (mA cm <sup>-2</sup> ) | reference |
|------------------------|------|------------------------------------------------------|----------------------------------------|-----------------------------------------|----------------|---------|--------|---------------------|----------------------------------------|-----------|
| Wang <i>et al.</i>     | 2015 | MAPbI <sub>3</sub>                                   | layer-by-layer                         | 2.0                                     | in article     | 11.5    | 52.4   | 1.10                | 19.9                                   | 37        |
| Tavakoli <i>et al.</i> | 2015 | MAPbI <sub>3</sub>                                   | CVD                                    | 3.0                                     | in article     | 9.2     | 61.0   | 0.95                | 15.9                                   | 38        |
| Leyden <i>et al.</i>   | 2015 | FAPb(I <sub>1-x</sub> Cl <sub>x</sub> ) <sub>3</sub> | CVD                                    | 3.3                                     | in article     | 12.5    | 59.0   | 0.98                | 21.5                                   | 39        |
| Luo <i>et al.</i>      | 2015 | MAPbI <sub>3</sub>                                   | CVD                                    | 3.7                                     | in article     | 12.7    | 64.5   | 0.91                | 21.7                                   | 40        |
| Tavakoli <i>et al.</i> | 2015 | MAPb(I <sub>1-x</sub> Cl <sub>x</sub> ) <sub>3</sub> | CVD                                    | 5.0                                     | in article     | 11.1    | 64.0   | 0.97                | 18.0                                   | 38        |
| Kim <i>et al.</i>      | 2015 | MAPbI <sub>3</sub>                                   | co-evaporation                         | 5.3                                     | from authors   | 13.7    | 67.6   | 1.12                | 18.1                                   | 41        |
| Yang <i>et al.</i>     | 2015 | MAPb(I <sub>1-x</sub> Cl <sub>x</sub> ) <sub>3</sub> | layer-by-layer                         | 6.8                                     | from authors   | 16.0    | 72.0   | 1.00                | 22.3                                   | 42        |
| Ng <i>et al.</i>       | 2015 | MAPbI <sub>3</sub>                                   | layer-by-layer                         | 15.8                                    | from authors   | 12.5    | 60.0   | 0.96                | 21.8                                   | 43        |
| Longo <i>et al.</i>    | 2015 | MAPbI <sub>3</sub>                                   | single-source evaporation <sup>†</sup> | 1,000.0                                 | from authors   | 12.2    | 68.0   | 1.07                | 18.0                                   | 44        |
| Yu <i>et al.</i>       | 2016 | MASnI <sub>3</sub>                                   | co-evaporation                         | n/a                                     | n/a            | 1.7     | 36.6   | 0.38                | 12.1                                   | 45        |
| Zhao <i>et al.</i>     | 2016 | MAPbI <sub>3</sub>                                   | co-evaporation                         | n/a                                     | n/a            | 15.7    | 75.4   | 1.10                | 18.9                                   | 46        |
| Leyden <i>et al.</i>   | 2016 | MAPbI <sub>3</sub>                                   | CVD                                    | 3.4                                     | in article     | 15.6    | 68.0   | 1.06                | 21.7                                   | 47        |
| Leyden <i>et al.</i>   | 2016 | FAPbI <sub>3</sub>                                   | CVD                                    | 3.4                                     | in article     | 10.4    | 53.0   | 1.02                | 19.5                                   | 47        |
| Hsiao <i>et al.</i>    | 2016 | MAPbI <sub>3</sub>                                   | co-evaporation                         | 4.0                                     | in article     | 17.6    | 73.2   | 1.06                | 22.7                                   | 48        |
| Kim <i>et al.</i>      | 2016 | MAPbI <sub>3</sub>                                   | co-evaporation                         | 4.7                                     | in article     | 14.5    | 72.0   | 1.00                | 20.1                                   | 49        |
| Momblona <i>et al.</i> | 2016 | MAPbI <sub>3</sub>                                   | co-evaporation                         | 4.8                                     | from authors   | 20.3    | 80.5   | 1.14                | 22.1                                   | 50        |
| Fan <i>et al.</i>      | 2016 | MAPbI <sub>3</sub>                                   | single-source evaporation              | 133.3                                   | in article     | 10.8    | 60.0   | 0.93                | 19.4                                   | 51        |
| Xu <i>et al.</i>       | 2016 | MAPbI <sub>3</sub>                                   | single-source evaporation <sup>†</sup> | 2,500.0                                 | in article     | 10.0    | 64.0   | 0.99                | 15.8                                   | 52        |
| Borchert <i>et al.</i> | 2017 | FAPbI <sub>3</sub>                                   | co-evaporation                         | 3.1                                     | from authors   | 15.8    | 70.8   | 1.01                | 22.1                                   | 7         |

| authors                     | year | absorber composition                                                                                         | deposition approach                    | deposition rate (nm min <sup>-1</sup> ) | source of rate | PCE (%) | FF (%) | V <sub>oc</sub> (V) | J <sub>sc</sub> (mA cm <sup>-2</sup> ) | reference |
|-----------------------------|------|--------------------------------------------------------------------------------------------------------------|----------------------------------------|-----------------------------------------|----------------|---------|--------|---------------------|----------------------------------------|-----------|
| Forgács <i>et al.</i>       | 2017 | MAPbI <sub>3</sub>                                                                                           | co-evaporation                         | 4.5                                     | from authors   | 19.1    | 81.6   | 1.07                | 21.8                                   | 53        |
| Forgács <i>et al.</i>       | 2017 | Cs <sub>0.15</sub> FA <sub>0.85</sub> Pb(I <sub>0.3</sub> Br <sub>0.7</sub> ) <sub>3</sub>                   | co-evaporation                         | 4.5                                     | from authors   | 10.7    | 77.8   | 1.20                | 11.4                                   | 53        |
| Patel <i>et al.</i>         | 2017 | MAPbI <sub>3</sub>                                                                                           | co-evaporation                         | 4.9                                     | in article     | 15.8    | 75.0   | 1.04                | 20.2                                   | 54        |
| Zhu <i>et al.</i>           | 2017 | Cs <sub>0.23</sub> MA <sub>0.77</sub> PbI <sub>3</sub>                                                       | co-evaporation                         | 10.0                                    | from authors   | 20.1    | 79.0   | 1.10                | 23.2                                   | 55        |
| Tavakoli <i>et al.</i>      | 2017 | MAPbI <sub>3</sub>                                                                                           | layer-by-layer                         | 17.5                                    | in article     | 15.9    | 83.0   | 0.96                | 20.1                                   | 56        |
| Cojocaru <i>et al.</i>      | 2018 | MAPbI <sub>3</sub>                                                                                           | co-evaporation                         | 4.2                                     | in article     | 17.1    | 75.0   | 1.01                | 21.3                                   | 57        |
| Longo <i>et al.</i>         | 2018 | MAPbI <sub>3</sub>                                                                                           | co-evaporation                         | 5.0                                     | from authors   | 17.4    | 81.2   | 1.09                | 19.6                                   | 58        |
| Longo <i>et al.</i>         | 2018 | MAPb(I <sub>0.8</sub> Br <sub>0.2</sub> ) <sub>3</sub>                                                       | co-evaporation                         | 5.0                                     | from authors   | 15.6    | 81.9   | 1.10                | 17.3                                   | 58        |
| Pérez-del-Rey <i>et al.</i> | 2018 | MAPbI <sub>3</sub>                                                                                           | co-evaporation                         | 5.9                                     | from authors   | 20.8    | 82.1   | 1.16                | 21.9                                   | 4         |
| Gil-Escrig <i>et al.</i>    | 2018 | Cs <sub>0.5</sub> FA <sub>0.4</sub> MA <sub>0.1</sub> Pb(I <sub>0.83</sub> Br <sub>0.17</sub> ) <sub>3</sub> | co-evaporation                         | 6.2                                     | from authors   | 16.0    | 82.0   | 1.15                | 17.0                                   | 13        |
| Gil-Escrig <i>et al.</i>    | 2018 | Cs <sub>0.5</sub> FA <sub>0.5</sub> Pb(I <sub>0.83</sub> Br <sub>0.17</sub> ) <sub>3</sub>                   | co-evaporation                         | 6.2                                     | from authors   | 8.5     | 57.0   | 0.85                | 17.6                                   | 13        |
| Luo <i>et al.</i>           | 2018 | Cs <sub>0.24</sub> FA <sub>0.76</sub> Pb(I <sub>1-x</sub> Br <sub>x</sub> ) <sub>3</sub>                     | layer-by-layer                         | 15.7                                    | from authors   | 17.3    | 71.0   | 1.07                | 22.9                                   | 59        |
| Luo <i>et al.</i>           | 2018 | FAPb(I <sub>1-x</sub> Br <sub>x</sub> ) <sub>3</sub>                                                         | layer-by-layer                         | 25.0                                    | from authors   | 11.3    | 65.0   | 1.00                | 17.4                                   | 59        |
| Tai <i>et al.</i>           | 2018 | MAPbI <sub>3</sub>                                                                                           | single-source evaporation <sup>†</sup> | 3,000.0                                 | from authors   | 16.8    | 75.0   | 0.98                | 23.1                                   | 60        |
| Abzieher <i>et al.</i>      | 2019 | MAPbI <sub>3</sub>                                                                                           | co-evaporation                         | 2.3                                     | from authors   | 15.6    | 72.0   | 1.06                | 20.3                                   | 61        |
| Abzieher <i>et al.</i>      | 2019 | MAPbI <sub>3</sub>                                                                                           | co-evaporation                         | 2.4                                     | from authors   | 16.8    | 79.0   | 1.03                | 20.7                                   | 62        |
| Borchert <i>et al.</i>      | 2019 | MAPbI <sub>3</sub>                                                                                           | co-evaporation                         | 2.5                                     | in article     | 15.0    | n/a    | n/a                 | n/a                                    | 63        |
| Qiu <i>et al.</i>           | 2019 | Cs <sub>0.1</sub> FA <sub>0.9</sub> Pb(I <sub>0.97</sub> Br <sub>0.03</sub> ) <sub>3</sub>                   | layer-by-layer                         | 2.5                                     | from authors   | 13.3    | 73.2   | 0.90                | 20.2                                   | 64        |
| La-Placa <i>et al.</i>      | 2019 | MAPbI <sub>3</sub>                                                                                           | co-evaporation                         | 4.5                                     | from authors   | 18.9    | 78.5   | 1.06                | 22.7                                   | 65        |

| authors                     | year | absorber composition                                                                 | deposition approach       | deposition rate (nm min <sup>-1</sup> ) | source of rate | PCE (%) | FF (%) | V <sub>oc</sub> (V) | J <sub>sc</sub> (mA cm <sup>-2</sup> ) | reference |
|-----------------------------|------|--------------------------------------------------------------------------------------|---------------------------|-----------------------------------------|----------------|---------|--------|---------------------|----------------------------------------|-----------|
| Kottokkaran <i>et al.</i>   | 2019 | MAPbI <sub>3</sub>                                                                   | co-evaporation            | 4.7                                     | from authors   | 17.4    | 77.0   | 1.03                | 22.0                                   | 66        |
| Ball <i>et al.</i>          | 2019 | Cs <sub>1-x</sub> FA <sub>x</sub> Pb <sub>1-y</sub> Sn <sub>y</sub> I <sub>3</sub>   | co-evaporation            | 5.1                                     | in article     | 11.5    | 74.0   | 0.78                | 20.3                                   | 67        |
| Pérez-del-Rey <i>et al.</i> | 2019 | MAPbI <sub>3</sub>                                                                   | co-evaporation            | 5.9                                     | from authors   | 19.3    | 79.3   | 1.10                | 22.0                                   | 68        |
| Palazon <i>et al.</i>       | 2019 | MAPbI <sub>3</sub>                                                                   | co-evaporation            | 6.6                                     | from authors   | 19.7    | 81.2   | 1.16                | 20.8                                   | 69        |
| Kiermasch <i>et al.</i>     | 2019 | MAPbI <sub>3</sub>                                                                   | co-evaporation            | 6.8                                     | from authors   | 18.2    | 72.0   | 1.11                | 22.7                                   | 70        |
| Lin <i>et al.</i>           | 2019 | MAPbI <sub>3</sub>                                                                   | layer-by-layer            | 9.1                                     | in article     | 17.3    | 72.4   | 1.01                | 23.7                                   | 71        |
| Hoerantner <i>et al.</i>    | 2019 | MAPbI <sub>3</sub>                                                                   | layer-by-layer            | 13.5                                    | in article     | 6.9     | 48.0   | 1.01                | 14.2                                   | 72        |
| Arivazhagan <i>et al.</i>   | 2019 | MAPbI <sub>3</sub>                                                                   | co-evaporation            | 17.5                                    | in article     | 15.7    | 66.8   | 1.08                | 21.8                                   | 73        |
| Tavakoli <i>et al.</i>      | 2019 | FA <sub>1-x</sub> MA <sub>x</sub> Pb(I <sub>1-y</sub> Cl <sub>y</sub> ) <sub>3</sub> | layer-by-layer            | 24.5                                    | in article     | 17.7    | 75.0   | 1.04                | 22.7                                   | 74        |
| Peng <i>et al.</i>          | 2019 | MAPbI <sub>3</sub>                                                                   | single-source evaporation | 36.0                                    | in article     | 2.6     | 34.0   | 0.77                | 10.0                                   | 75        |
| Zheng <i>et al.</i>         | 2019 | BA <sub>2</sub> MA <sub>3</sub> Pb <sub>4</sub> I <sub>13</sub>                      | single-source evaporation | 400.0                                   | from authors   | 2.5     | 45.8   | 0.85                | 6.5                                    | 76        |
| Momblona <i>et al.</i>      | 2020 | MABiI <sub>3</sub>                                                                   | co-evaporation            | n/a                                     | n/a            | 0.1     | 43.0   | 0.67                | 0.13                                   | 77        |
| Qiu <i>et al.</i>           | 2020 | Cs <sub>1-x</sub> FA <sub>x</sub> PbI <sub>3</sub>                                   | CVD                       | 1.6                                     | in article     | 7.6     | 42.1   | 0.96                | 19.0                                   | 78        |
| Ngqoloda <i>et al.</i>      | 2020 | MAPbI <sub>3</sub>                                                                   | CVD                       | 1.8                                     | in article     | 11.7    | 59.5   | 0.88                | 22.4                                   | 79        |
| Hellmann <i>et al.</i>      | 2020 | MAPbI <sub>3</sub>                                                                   | co-evaporation            | 2.1                                     | from authors   | 13.7    | n/a    | 1.03                | 19.4                                   | 80        |
| Patel <i>et al.</i>         | 2020 | MAPbI <sub>3</sub>                                                                   | co-evaporation            | 2.5                                     | in article     | 17.0    | 77.0   | 1.02                | 21.8                                   | 81        |
| Harding <i>et al.</i>       | 2020 | MAPbI <sub>3</sub>                                                                   | layer-by-layer            | 2.6                                     | in article     | 12.1    | 56.6   | 0.98                | 21.9                                   | 82        |
| Lohmann <i>et al.</i>       | 2020 | MAPbI <sub>3</sub>                                                                   | co-evaporation            | 2.9                                     | in article     | 18.3    | 77.8   | 1.08                | 21.7                                   | 83        |
| Suwa <i>et al.</i>          | 2020 | MAPbI <sub>3</sub>                                                                   | co-evaporation            | 4.2                                     | from authors   | 8.1     | 46.0   | 0.97                | 18.2                                   | 84        |

| authors                   | year | absorber composition                                                                       | deposition approach | deposition rate (nm min <sup>-1</sup> ) | source of rate | PCE (%) | FF (%) | V <sub>oc</sub> (V) | J <sub>sc</sub> (mA cm <sup>-2</sup> ) | reference |
|---------------------------|------|--------------------------------------------------------------------------------------------|---------------------|-----------------------------------------|----------------|---------|--------|---------------------|----------------------------------------|-----------|
| Li <i>et al.</i>          | 2020 | MAPbI <sub>3</sub>                                                                         | co-evaporation      | 4.3                                     | from authors   | 19.1    | 76.4   | 1.12                | 22.3                                   | 85        |
| Roß <i>et al.</i>         | 2020 | MAPbI <sub>3</sub>                                                                         | co-evaporation      | 5.0                                     | in article     | 20.3    | 79.0   | 1.15                | 22.4                                   | 86        |
| Gil-Escrig <i>et al.</i>  | 2020 | FA <sub>1-x</sub> MA <sub>x</sub> PbI <sub>3</sub>                                         | co-evaporation      | 5.6                                     | from authors   | 18.8    | 76.0   | 1.09                | 22.6                                   | 87        |
| Babaei <i>et al.</i>      | 2020 | MAPb(I <sub>1-x</sub> Cl <sub>x</sub> ) <sub>3</sub>                                       | co-evaporation      | 5.6                                     | from authors   | 16.1    | 73.0   | 1.13                | 19.5                                   | 88        |
| Kim <i>et al.</i>         | 2020 | MAPbI <sub>3</sub>                                                                         | co-evaporation      | 5.6                                     | from authors   | 18.7    | n/a    | n/a                 | n/a                                    | 89        |
| Li <i>et al.</i>          | 2020 | MAPbI <sub>3</sub>                                                                         | co-evaporation      | 5.8                                     | in article     | 20.3    | 77.7   | 1.12                | 23.3                                   | 90        |
| Zanoni <i>et al.</i>      | 2020 | MAPbI <sub>3</sub>                                                                         | co-evaporation      | 6.6                                     | from authors   | 18.0    | 78.3   | 1.12                | 20.3                                   | 91        |
| Babaei <i>et al.</i>      | 2020 | MAPbI <sub>3</sub>                                                                         | co-evaporation      | 6.7                                     | from authors   | 18.4    | n/a    | n/a                 | n/a                                    | 92        |
| Igual-Muñoz <i>et al.</i> | 2020 | FAPb <sub>0.5</sub> Sn <sub>0.5</sub> I <sub>3</sub>                                       | co-evaporation      | 7.6                                     | from authors   | 14.0    | 79.3   | 0.72                | 24.5                                   | 2         |
| Chiang <i>et al.</i>      | 2020 | Cs <sub>0.3</sub> FA <sub>0.7</sub> Pb(I <sub>0.9</sub> Br <sub>0.1</sub> ) <sub>3</sub>   | co-evaporation      | 8.2                                     | from authors   | 18.1    | 74.6   | 1.06                | 23.0                                   | 93        |
| Ji <i>et al.</i>          | 2020 | Cs <sub>0.1</sub> FA <sub>0.9</sub> Pb(I <sub>0.97</sub> Br <sub>0.03</sub> ) <sub>3</sub> | co-evaporation      | 10.0                                    | from authors   | 16.6    | 79.7   | 1.07                | 19.5                                   | 94        |
| Lei <i>et al.</i>         | 2020 | MAPbI <sub>3</sub>                                                                         | layer-by-layer      | 11.4                                    | in article     | 19.2    | 80.9   | 1.06                | 22.4                                   | 95        |
| Qiu <i>et al.</i>         | 2020 | Cs <sub>1-x</sub> FA <sub>x</sub> PbI <sub>3</sub>                                         | CVD                 | 37.0                                    | in article     | 15.5    | 70.2   | 0.99                | 22.3                                   | 78        |
| Tavakoli <i>et al.</i>    | 2021 | MAPbI <sub>3</sub>                                                                         | co-evaporation      | n/a                                     | n/a            | 19.4    | 77.0   | 1.09                | 23.1                                   | 96        |
| Tavakoli <i>et al.</i>    | 2021 | MAPbI <sub>3</sub>                                                                         | co-evaporation      | n/a                                     | n/a            | 20.3    | 78.5   | 1.11                | 23.3                                   | 97        |
| Smecca <i>et al.</i>      | 2021 | MAPbI <sub>3</sub>                                                                         | layer-by-layer      | 1.7                                     | in article     | 17.5    | 75.4   | 1.07                | 21.6                                   | 98        |
| Heinze <i>et al.</i>      | 2021 | MAPbI <sub>3</sub>                                                                         | co-evaporation      | 1.7                                     | from authors   | 14.3    | 74.5   | 0.96                | 20.0                                   | 99        |
| Sahli <i>et al.</i>       | 2021 | MAPbI <sub>3</sub>                                                                         | CVD                 | 2.0                                     | in article     | 12.3    | n/a    | n/a                 | n/a                                    | 100       |
| Choi <i>et al.</i>        | 2021 | MAPbI <sub>3</sub>                                                                         | layer-by-layer      | 3.8                                     | from authors   | 18.5    | 79.0   | 1.07                | 21.9                                   | 101       |

| authors                  | year | absorber composition                                                                         | deposition approach       | deposition rate (nm min <sup>-1</sup> ) | source of rate | PCE (%) | FF (%) | V <sub>oc</sub> (V) | J <sub>sc</sub> (mA cm <sup>-2</sup> ) | reference |
|--------------------------|------|----------------------------------------------------------------------------------------------|---------------------------|-----------------------------------------|----------------|---------|--------|---------------------|----------------------------------------|-----------|
| Li <i>et al.</i>         | 2021 | MAPbI <sub>3</sub>                                                                           | co-evaporation            | 4.2                                     | from authors   | 20.6    | 82.4   | 1.12                | 22.3                                   | 102       |
| Li <i>et al.</i>         | 2021 | MAPbI <sub>3</sub>                                                                           | co-evaporation            | 4.2                                     | in article     | 20.6    | 82.4   | 1.12                | 22.3                                   | 102       |
| Li <i>et al.</i>         | 2021 | MAPbI <sub>3</sub>                                                                           | co-evaporation            | 4.2                                     | in article     | 19.3    | 80.3   | 1.11                | 21.7                                   | 102       |
| Dewi <i>et al.</i>       | 2021 | MAPbI <sub>3</sub>                                                                           | co-evaporation            | 4.6                                     | in article     | 17.2    | 74.6   | 1.06                | 21.7                                   | 103       |
| Paliwal <i>et al.</i>    | 2021 | MAPbI <sub>3</sub>                                                                           | co-evaporation            | 4.9                                     | from authors   | 13.0    | 76.5   | 1.12                | 15.2                                   | 104       |
| Susic <i>et al.</i>      | 2021 | MAPbI <sub>3</sub>                                                                           | co-evaporation            | 5.0                                     | from authors   | 18.3    | 76.0   | 1.1                 | 21.9                                   | 105       |
| Gil-Escrig <i>et al.</i> | 2021 | MAPbI <sub>3</sub>                                                                           | co-evaporation            | 5.6                                     | from authors   | 18.2    | 78.0   | 1.12                | 20.9                                   | 106       |
| Klipfel <i>et al.</i>    | 2021 | MAPbI <sub>3</sub>                                                                           | co-evaporation            | 5.6                                     | in article     | 15.2    | 77.4   | 0.98                | 19.9                                   | 107       |
| Gallet <i>et al.</i>     | 2021 | MAPbI <sub>3</sub>                                                                           | co-evaporation            | 5.6                                     | from authors   | 14.7    | 77.0   | 1.05                | 18.2                                   | 108       |
| Roß <i>et al.</i>        | 2021 | FA <sub>0.53</sub> MA <sub>0.47</sub> PbI <sub>3</sub>                                       | co-evaporation            | 6.3                                     | in article     | 20.4    | 75.9   | 1.05                | 25.7                                   | 109       |
| Roß <i>et al.</i>        | 2021 | FAPbI <sub>3</sub>                                                                           | co-evaporation            | 6.5                                     | in article     | 15.8    | n/a    | n/a                 | n/a                                    | 109       |
| Kaya <i>et al.</i>       | 2021 | MAPbI <sub>3</sub>                                                                           | co-evaporation            | 6.7                                     | from authors   | 19.2    | 79.7   | 1.09                | 22.1                                   | 110       |
| Feng <i>et al.</i>       | 2021 | Cs <sub>1-x</sub> FA <sub>x</sub> PbI <sub>3</sub>                                           | layer-by-layer            | 6.8                                     | from authors   | 21.3    | 77.2   | 1.11                | 24.9                                   | 111       |
| Gil-Escrig <i>et al.</i> | 2021 | Cs <sub>0.35</sub> FA <sub>0.65</sub> Pb(I <sub>0.73</sub> Br <sub>0.27</sub> ) <sub>3</sub> | co-evaporation            | 7.7                                     | from authors   | 16.8    | 79.0   | 1.18                | 18.0                                   | 112       |
| Abzieher <i>et al.</i>   | 2021 | MAPbI <sub>3</sub>                                                                           | co-evaporation            | 9.3                                     | from authors   | 19.5    | 83.0   | 1.08                | 21.6                                   | 113       |
| Ritzer <i>et al.</i>     | 2021 | MAPbI <sub>3</sub>                                                                           | co-evaporation            | 9.3                                     | from authors   | 19.2    | 82.0   | 1.08                | 21.6                                   | 114       |
| Lin <i>et al.</i>        | 2021 | AL <sub>1-x</sub> MA <sub>x</sub> PbI <sub>3</sub>                                           | layer-by-layer            | 14.3                                    | from authors   | 18.2    | 74.8   | 1.08                | 22.6                                   | 115       |
| Lin <i>et al.</i>        | 2021 | MAPbI <sub>3</sub>                                                                           | layer-by-layer            | 14.3                                    | from authors   | 17.2    | 72.7   | 1.05                | 22.6                                   | 115       |
| Gao <i>et al.</i>        | 2021 | MAPb(I <sub>1-x</sub> Cl <sub>x</sub> ) <sub>3</sub>                                         | single-source evaporation | 96.7                                    | in article     | 15.2    | 71.0   | 0.93                | 23.0                                   | 116       |

| authors                    | year | absorber composition                                                                                        | deposition approach       | deposition rate (nm min <sup>-1</sup> ) | source of rate | PCE (%) | FF (%) | V <sub>oc</sub> (V) | J <sub>sc</sub> (mA cm <sup>-2</sup> ) | reference |
|----------------------------|------|-------------------------------------------------------------------------------------------------------------|---------------------------|-----------------------------------------|----------------|---------|--------|---------------------|----------------------------------------|-----------|
| Susic <i>et al.</i>        | 2022 | CsMAFAGAPb(I <sub>1-x</sub> Br <sub>x</sub> ) <sub>3</sub>                                                  | co-evaporation            | n/a                                     | n/a            | 16.1    | 81.3   | 1.15                | 17.3                                   | 117       |
| Susic <i>et al.</i>        | 2022 | Cs <sub>1-y-z</sub> MA <sub>y</sub> FA <sub>z</sub> Pb(I <sub>1-x</sub> Br <sub>x</sub> ) <sub>3</sub>      | co-evaporation            | n/a                                     | n/a            | 16.4    | n/a    | n/a                 | n/a                                    | 117       |
| Lohmann <i>et al.</i>      | 2022 | Cs <sub>0.17</sub> FA <sub>0.83</sub> Pb(I <sub>1-x</sub> Cl <sub>x</sub> ) <sub>3</sub>                    | co-evaporation            | 3.1                                     | from authors   | 19.3    | 79.0   | 1.06                | 23.0                                   | 118       |
| Kim <i>et al.</i>          | 2022 | MAPbI <sub>3</sub>                                                                                          | co-evaporation            | 5.6                                     | from authors   | 18.1    | 75.0   | 1.10                | 21.9                                   | 119       |
| Kroll <i>et al.</i>        | 2022 | Cs <sub>1-x</sub> FA <sub>x</sub> Pb(I <sub>1-y</sub> Br <sub>y</sub> ) <sub>3</sub>                        | co-evaporation            | 6.0                                     | in article     | 15.6    | 76.6   | 1.09                | 18.7                                   | 120       |
| Li <i>et al.</i>           | 2022 | Cs <sub>0.05</sub> FA <sub>0.95</sub> Pb(I <sub>1-x</sub> Cl <sub>x</sub> ) <sub>3</sub>                    | layer-by-layer            | 11.2                                    | from authors   | 24.4    | 81.8   | 1.15                | 25.9                                   | 9         |
| Choi <i>et al.</i>         | 2022 | MASnI <sub>3</sub>                                                                                          | single-source evaporation | 57.1                                    | in article     | 1.7     | 39.0   | 0.32                | 13.8                                   | 121       |
| Chiang <i>et al.</i>       | 2023 | Cs <sub>0.3</sub> FA <sub>0.7</sub> Pb(I <sub>0.76</sub> Br <sub>0.24</sub> ) <sub>3</sub>                  | co-evaporation            | n/a                                     | n/a            | 17.7    | 78.4   | 1.18                | 19.1                                   | 11        |
| Chiang <i>et al.</i>       | 2023 | Cs <sub>0.3</sub> FA <sub>0.7</sub> Pb(I <sub>0.9</sub> Br <sub>0.1</sub> ) <sub>3</sub>                    | co-evaporation            | n/a                                     | n/a            | 20.0    | 78.7   | 1.11                | 23.0                                   | 11        |
| Yuan <i>et al.</i>         | 2023 | Cs <sub>0.17</sub> FA <sub>0.83</sub> PbI <sub>3</sub>                                                      | co-evaporation            | 3.2                                     | from authors   | 13.9    | 72.0   | 0.93                | 19.9                                   | 122       |
| Li <i>et al.</i>           | 2023 | Cs <sub>0.1</sub> FA <sub>0.9</sub> (I <sub>0.74</sub> Cl <sub>0.19</sub> Br <sub>0.07</sub> ) <sub>3</sub> | layer-by-layer            | 8.9                                     | in article     | 24.4    | 82.2   | 1.16                | 25.5                                   | 123       |
| Soto-Montero <i>et al.</i> | 2023 | FA <sub>0.45</sub> MA <sub>0.55</sub> PbI <sub>3</sub>                                                      | single-source evaporation | 10.0                                    | from authors   | 14.0    | 70.5   | 1.00                | 19.9                                   | 124       |
| Soto-Montero <i>et al.</i> | 2023 | FA <sub>0.55</sub> MA <sub>0.45</sub> Pb(I <sub>1-x</sub> Cl <sub>x</sub> ) <sub>3</sub>                    | single-source evaporation | 7.0                                     | from authors   | 19.7    | 79.4   | 1.15                | 21.6                                   | 125       |

<sup>†</sup> processes are batch processes that rely on solution-based fabrication steps,  
MA: methylammonium (CH<sub>3</sub>NH<sub>3</sub><sup>+</sup>), FA: formamidinium (CH(NH<sub>2</sub>)<sub>2</sub><sup>+</sup>), BA: butylammonium (C<sub>4</sub>H<sub>12</sub>N<sup>+</sup>), AL: anilinium (C<sub>6</sub>H<sub>5</sub>NH<sub>3</sub><sup>+</sup>), GA: guanidinium (CH<sub>6</sub>N<sub>3</sub><sup>+</sup>)

**Tab. S4 | Solar cell parameters and deposition rates of vapor-processed inorganic perovskite solar cells.** Only the champion device of the respective references is provided. The table only shows devices with accessible deposition rates. Solar cell parameters shown here represent values extracted from the reverse  $J$ - $V$  scan. Data is presented visually in Figure 3 in the main manuscript.

| authors                     | year | absorber composition                                 | deposition approach       | deposition rate (nm min <sup>-1</sup> ) | source of rate | PCE (%) | FF (%) | V <sub>oc</sub> (V) | J <sub>sc</sub> (mA cm <sup>-2</sup> ) | reference |
|-----------------------------|------|------------------------------------------------------|---------------------------|-----------------------------------------|----------------|---------|--------|---------------------|----------------------------------------|-----------|
| Frolova <i>et al.</i>       | 2016 | CsPbI <sub>3</sub>                                   | co-evaporation            | n/a                                     | n/a            | 10.5    | 71.6   | 1.06                | 13.8                                   | 126       |
| Ma <i>et al.</i>            | 2016 | CsPbI <sub>2</sub> Br <sub>2</sub>                   | co-evaporation            | 2.2                                     | from authors   | 4.7     | 56.0   | 0.96                | 8.7                                    | 127       |
| Moghe <i>et al.</i>         | 2016 | CsSn(Br <sub>1-x</sub> F <sub>x</sub> ) <sub>3</sub> | layer-by-layer            | 2.8                                     | in article     | 0.6     | n/a    | n/a                 | n/a                                    | 128       |
| Yonezawa <i>et al.</i>      | 2017 | CsPbI <sub>3</sub>                                   | layer-by-layer            | n/a                                     | n/a            | 5.7     | 67.0   | 0.71                | 12.1                                   | 129       |
| Ma <i>et al.</i>            | 2017 | CsPbI <sub>2</sub> Br                                | co-evaporation            | 1.5                                     | from authors   | 7.7     | 67.0   | 1.01                | 11.5                                   | 130       |
| Shahiduzzaman <i>et al.</i> | 2017 | CsPbI <sub>3</sub>                                   | layer-by-layer            | 2.4                                     | in article     | 6.8     | 72.0   | 0.79                | 12.1                                   | 131       |
| Hutter <i>et al.</i>        | 2017 | CsPbI <sub>3</sub>                                   | layer-by-layer            | 5.2                                     | from authors   | 8.8     | 68.0   | 1.00                | 13.0                                   | 132       |
| Chen <i>et al.</i>          | 2017 | CsPbI <sub>2</sub> Br                                | co-evaporation            | 11.4                                    | from authors   | 11.8    | 68.0   | 1.13                | 15.2                                   | 133       |
| Chen <i>et al.</i>          | 2017 | CsPbI <sub>3</sub>                                   | co-evaporation            | 12.0                                    | from authors   | 9.4     | 56.0   | 0.98                | 17.3                                   | 133       |
| Chen <i>et al.</i>          | 2018 | Cs <sub>2</sub> TiBr <sub>6</sub>                    | layer-by-layer            | 0.3                                     | in article     | 3.3     | 56.0   | 1.02                | 5.7                                    | 134       |
| Lei <i>et al.</i>           | 2018 | CsPbBr <sub>3</sub>                                  | co-evaporation            | 5.0                                     | from authors   | 7.0     | 78.5   | 1.27                | 7.0                                    | 135       |
| Kottokkaran <i>et al.</i>   | 2018 | CsPbI <sub>3</sub>                                   | layer-by-layer            | 5.3                                     | from authors   | 9.5     | 65.0   | 0.95                | 14.9                                   | 136       |
| Li <i>et al.</i>            | 2018 | CsPbBr <sub>3</sub>                                  | layer-by-layer            | 5.7                                     | in article     | 8.3     | 75.9   | 1.30                | 8.5                                    | 137       |
| Park <i>et al.</i>          | 2018 | CsPbI <sub>2</sub> Br                                | co-evaporation            | 14.8                                    | in article     | 5.7     | 49.0   | 1.10                | 10.9                                   | 138       |
| Chen <i>et al.</i>          | 2018 | CsPbBr <sub>3</sub>                                  | co-evaporation            | 22.5                                    | from authors   | 7.8     | 77.1   | 1.44                | 7.0                                    | 139       |
| Fan <i>et al.</i>           | 2019 | Cs <sub>2</sub> AgBiBr <sub>6</sub>                  | single-source evaporation | 1.9                                     | in article     | 0.7     | 65.0   | 0.87                | 1.2                                    | 140       |
| Tong <i>et al.</i>          | 2019 | CsPbBr <sub>3</sub>                                  | layer-by-layer            | 3.0                                     | in article     | 10.9    | 74.5   | 1.50                | 9.8                                    | 19        |

| authors                   | year | absorber composition                                  | deposition approach                    | deposition rate (nm min <sup>-1</sup> ) | source of rate | PCE (%) | FF (%) | V <sub>oc</sub> (V) | J <sub>sc</sub> (mA cm <sup>-2</sup> ) | reference |
|---------------------------|------|-------------------------------------------------------|----------------------------------------|-----------------------------------------|----------------|---------|--------|---------------------|----------------------------------------|-----------|
| Chen <i>et al.</i>        | 2019 | CsPbBr <sub>3</sub>                                   | layer-by-layer                         | 3.0                                     | from authors   | 9.0     | 73.1   | 1.44                | 8.5                                    | 141       |
| Lin <i>et al.</i>         | 2019 | CsPbI <sub>2</sub> Br                                 | layer-by-layer                         | 6.7                                     | in article     | 13.0    | 74.0   | 1.13                | 15.6                                   | 142       |
| Becker <i>et al.</i>      | 2019 | CsPbI <sub>3</sub>                                    | co-evaporation                         | 7.3                                     | from authors   | 12.5    | 73.0   | 0.96                | 17.8                                   | 15        |
| Liu <i>et al.</i>         | 2019 | CsPbBr <sub>3</sub>                                   | layer-by-layer                         | 33.3                                    | in article     | 7.6     | 75.2   | 1.33                | 7.6                                    | 143       |
| Zhang <i>et al.</i>       | 2019 | CsPbBr <sub>3</sub>                                   | layer-by-layer                         | 36.5                                    | from authors   | 8.9     | 80.4   | 1.52                | 7.2                                    | 144       |
| Tai <i>et al.</i>         | 2019 | CsPbI <sub>2</sub> Br                                 | single-source evaporation <sup>†</sup> | 2,500.0                                 | from authors   | 12.2    | 72.0   | 1.10                | 15.4                                   | 145       |
| Murata <i>et al.</i>      | 2020 | CsPbBr <sub>3</sub>                                   | layer-by-layer                         | n/a                                     | n/a            | 6.6     | 68.8   | 1.47                | 6.6                                    | 146       |
| Li <i>et al.</i>          | 2020 | CsPbBr <sub>3</sub>                                   | single-source evaporation              | 3.6                                     | in article     | 8.7     | 81.0   | 1.37                | 7.8                                    | 147       |
| Gaonkar <i>et al.</i>     | 2020 | CsPb(I <sub>1-x</sub> Br <sub>x</sub> ) <sub>3</sub>  | layer-by-layer                         | 5.7                                     | from authors   | 11.8    | n/a    | n/a                 | n/a                                    | 148       |
| Mi <i>et al.</i>          | 2020 | CsPbBr <sub>3</sub>                                   | layer-by-layer                         | 6.3                                     | in article     | 7.1     | 73.0   | 1.36                | 7.2                                    | 149       |
| Igual-Muñoz <i>et al.</i> | 2020 | CsPbI <sub>2</sub> Br                                 | co-evaporation                         | 11.9                                    | in article     | 10.0    | 73.1   | 0.96                | 14.3                                   | 150       |
| Xiang <i>et al.</i>       | 2020 | CsPbBr <sub>3</sub>                                   | layer-by-layer                         | 30.0                                    | from authors   | 9.4     | 82.2   | 1.55                | 7.4                                    | 151       |
| Hua <i>et al.</i>         | 2020 | CsPbBr <sub>3</sub>                                   | layer-by-layer                         | 30.0                                    | from authors   | 7.2     | 79.0   | 1.42                | 6.5                                    | 152       |
| Monroy <i>et al.</i>      | 2021 | CsPbI <sub>3</sub>                                    | co-evaporation                         | n/a                                     | n/a            | 8.8     | 68.0   | 0.93                | 14.3                                   | 153       |
| Abib <i>et al.</i>        | 2021 | Cs(Sn <sub>1-x</sub> Pb <sub>x</sub> )Br <sub>3</sub> | single-source evaporation              | 3.0                                     | in article     | 9.0     | 71.0   | 1.36                | 9.3                                    | 154       |
| Duan <i>et al.</i>        | 2021 | CsPbBr <sub>3</sub>                                   | co-evaporation                         | 5.9                                     | from authors   | 9.4     | 71.3   | 1.35                | 9.8                                    | 155       |
| Zhu <i>et al.</i>         | 2022 | CsPbBr <sub>3</sub>                                   | layer-by-layer                         | n/a                                     | n/a            | 7.9     | 71.0   | 1.64                | 6.7                                    | 156       |
| Liao <i>et al.</i>        | 2022 | CsPbI <sub>2</sub> Br                                 | layer-by-layer                         | 7.1                                     | in article     | 10.0    | 76.0   | 1.05                | 12.3                                   | 157       |
| Liu <i>et al.</i>         | 2022 | CsPbBr <sub>3</sub>                                   | single-source evaporation              | 31.0                                    | in article     | 7.8     | 80.0   | 1.43                | 6.8                                    | 158       |

| authors                | year | absorber composition                                     | deposition approach       | deposition rate (nm min <sup>-1</sup> ) | source of rate | PCE (%) | FF (%) | V <sub>oc</sub> (V) | J <sub>sc</sub> (mA cm <sup>-2</sup> ) | reference     |
|------------------------|------|----------------------------------------------------------|---------------------------|-----------------------------------------|----------------|---------|--------|---------------------|----------------------------------------|---------------|
| Abzieher <i>et al.</i> | 2022 | CsPb(I <sub>0.83</sub> Br <sub>0.17</sub> ) <sub>3</sub> | single-source evaporation | 84.4                                    | In article     | 14.9    | 76.0   | 1.17                | 16.8                                   | <sup>17</sup> |
| Abzieher <i>et al.</i> | 2022 | CsPb(I <sub>0.83</sub> Br <sub>0.17</sub> ) <sub>3</sub> | single-source evaporation | 134.3                                   | In article     | 13.4    | 72.1   | 1.14                | 16.3                                   | <sup>17</sup> |

<sup>†</sup> processes are batch processes that rely on solution-based fabrication steps

**Tab. S5 | Industry survey – List of companies working in the field of perovskite-based photovoltaics.** This table summarizes all companies that were identified by the authors to actively work in the field of perovskite-based photovoltaics. The last column highlights whether the data of the industry outlook in the main manuscript is based on a reply provided by the respective companies to the survey or collected via publicly accessible sources (e.g., webpages, press releases, job openings, or similar). Early-stage companies are defined as companies that have been founded with the goal to commercialize the perovskite technology (or have switched to the field soon after foundation), while established companies have a longer tradition in the field and typically worked on other technologies before.

| company                                                   | country   | industry sector          | company type | start of activities | source of information |
|-----------------------------------------------------------|-----------|--------------------------|--------------|---------------------|-----------------------|
| Greatcell Energy Pty. Ltd.                                | Australia | Materials, Solar Modules | early stage  | 2012                | company               |
| Halocell                                                  | Australia | Solar Modules            | early stage  | 2019                | public information    |
| Angstrom Engineering Inc.                                 | Canada    | Machinery                | established  | 2008                | company               |
| Solaires Enterprises Inc.                                 | Canada    | Materials                | early stage  | 2020                | company               |
| BOE Technology Group Co. Ltd.                             | China     | Solar Modules            | established  | 2023                | public information    |
| Borun New Material Technology Ltd.                        | China     | Materials                | established  | n/a                 | public information    |
| BYD Co. Ltd.                                              | China     | Solar Modules            | established  | 2023                | public information    |
| Fangsheng Optoelectronics Equipment & Technology Co. Ltd. | China     | Machinery                | established  | n/a                 | public information    |
| GCL Nano Co. Ltd.                                         | China     | Solar Modules            | established  | 2016                | company               |
| Hangzhou Zhongneng Photoelectricity Technology Co. Ltd.   | China     | Machinery, Solar Modules | early stage  | 2015                | company               |
| Hubei Wonder Solar LLC.                                   | China     | Materials, Solar Modules | early stage  | 2012                | company               |
| Infi-Solar                                                | China     | Solar Modules            | early stage  | 2022                | public information    |
| JinkoSolar                                                | China     | Solar Modules            | established  | n/a                 | company               |

| company                                | country | industry sector          | company type | start of activities | source of information |
|----------------------------------------|---------|--------------------------|--------------|---------------------|-----------------------|
| LONGi Green Energy Technology Co. Ltd. | China   | Solar Modules            | established  | 2020                | company               |
| Microquanta Semiconductor Co. Ltd.     | China   | Solar Modules            | early stage  | 2015                | company               |
| Renshine Solar Co. Ltd.                | China   | Solar Modules            | early stage  | 2021                | public information    |
| Shengcheng Solar Equipment Co. Ltd.    | China   | Machinery                | established  | 2021                | public information    |
| Tongwei Solar                          | China   | Solar Modules            | established  | n/a                 | public information    |
| Trina Solar Co. Ltd.                   | China   | Solar Modules            | established  | n/a                 | company               |
| Wuxi UtmoLight Technology              | China   | Solar Modules            | early stage  | 2020                | company               |
| Yingli Energy Company Ltd.             | China   | Solar Modules            | established  | 2018                | company               |
| FOM Technologies                       | Denmark | Machinery                | early stage  | 2014                | company               |
| infinityPV ApS                         | Denmark | Materials, Machinery     | early stage  | n/a                 | public information    |
| Riber                                  | France  | Machinery                | established  | n/a                 | public information    |
| VOLTEC Solar                           | France  | Solar Modules            | established  | n/a                 | public information    |
| APEVA SE                               | Germany | Machinery                | early stage  | 2018                | company               |
| CreaPhys GmbH                          | Germany | Materials, Machinery     | established  | 2013                | company               |
| Dr. Eberl MBE-Komponenten GmbH         | Germany | Machinery                | established  | n/a                 | company               |
| Heraeus                                | Germany | Materials                | established  | 2010                | company               |
| Leybold GmbH                           | Germany | Machinery                | established  | n/a                 | company               |
| MBRAUN GmbH                            | Germany | Machinery                | established  | 2014                | company               |
| PEROSOL                                | Germany | Machinery, Solar Modules | early stage  | 2021                | company               |

| company                                | country | industry sector                     | company type | start of activities | source of information |
|----------------------------------------|---------|-------------------------------------|--------------|---------------------|-----------------------|
| SCIPRIOS GmbH                          | Germany | Machinery                           | early stage  | 2020                | company               |
| SINGULUS TECHNOLOGIES AG               | Germany | Machinery                           | established  | n/a                 | company               |
| TubeSolar AG                           | Germany | Solar Modules                       | established  | 2021                | company               |
| VON ARDENNE GmbH                       | Germany | Machinery                           | established  | 2017                | company               |
| P3C Technology and Solutions Pvt. Ltd. | India   | Solar Modules                       | early stage  | 2018                | company               |
| KiMia Solar                            | Iran    | Materials, Machinery, Solar Modules | early stage  | 2015                | company               |
| 3GSolar Photovoltaics Ltd.             | Israel  | Solar Modules                       | early stage  | n/a                 | public information    |
| Enel Green Power S.p.A.                | Italy   | Solar Modules                       | established  | 2019                | company               |
| AISIN SEIKI Co. Ltd.                   | Japan   | Solar Modules                       | established  | n/a                 | public information    |
| EneCoat Technologies Co. Ltd.          | Japan   | Materials, Solar Modules            | early stage  | 2019                | company               |
| Kaneka Corporation                     | Japan   | Solar Modules                       | established  | 2014                | company               |
| Mitsubishi Chemical Corporation        | Japan   | Materials                           | established  | n/a                 | public information    |
| Panasonic Corporation                  | Japan   | Solar Modules                       | established  | n/a                 | company               |
| Sekisui Chemical Co. Ltd.              | Japan   | Solar Modules                       | established  | n/a                 | public information    |
| Sharp Energy Solutions Corp.           | Japan   | Solar Modules                       | established  | n/a                 | public information    |
| Tokyo Chemical Industry Co. Ltd.       | Japan   | Materials                           | established  | 2014                | company               |
| Toray Engineering Co. Ltd.             | Japan   | Machinery                           | established  | 2015                | company               |
| Toshiba Corporation                    | Japan   | Solar Modules                       | established  | n/a                 | public information    |
| Renewable Energy Corporation           | Norway  | Solar Modules                       | established  | 2023                | public information    |

| company                           | country         | industry sector          | company type | start of activities | source of information |
|-----------------------------------|-----------------|--------------------------|--------------|---------------------|-----------------------|
| Saule Technologies S.A.           | Poland          | Solar Modules            | early stage  | 2014                | company               |
| Hanwha Q CELLS Co. Ltd.           | South Korea     | Solar Module             | established  | n/a                 | public information    |
| SELCOS Co. Ltd.                   | South Korea     | Machinery                | established  | 2019                | company               |
| Sunic System Co. Ltd.             | South Korea     | Machinery                | established  | n/a                 | public information    |
| ULTECH CO. Ltd.                   | South Korea     | Machinery                | established  | 2018                | company               |
| UniTest Inc.                      | South Korea     | Solar Modules            | established  | 2015                | public information    |
| Dyename AB                        | Sweden          | Materials                | established  | 2013                | company               |
| EVOLAR AB                         | Sweden          | Machinery                | early stage  | 2019                | company               |
| Meyer Burger Technology AG        | Switzerland     | Machinery, Solar Modules | established  | 2019                | company               |
| Perovskia SA                      | Switzerland     | Solar Modules            | early stage  | 2021                | company               |
| Solaronix SA                      | Switzerland     | Materials, Solar Modules | early stage  | 2013                | company               |
| FrontMaterials Co. Ltd.           | Taiwan          | Materials                | early stage  | n/a                 | public information    |
| Kingyoun Optoelectronics Co. Ltd. | Taiwan          | Machinery                | established  | n/a                 | public information    |
| Luminescence Technology Corp.     | Taiwan          | Materials                | established  | 2010                | company               |
| Taiwan Perovskite Solar Corp.     | Taiwan          | Solar Modules            | early stage  | 2021                | public information    |
| SMIT Thermal Solutions B.V.       | The Netherlands | Machinery                | established  | 2016                | company               |
| TSST                              | The Netherlands | Machinery                | established  | 2018                | company               |
| PeroSolar                         | Turkey          | Solar Modules            | early stage  | 2018                | company               |
| G24 Power Limited                 | UK              | Solar Modules            | early stage  | n/a                 | public information    |

| company                                 | country     | industry sector          | company type | start of activities | source of information |
|-----------------------------------------|-------------|--------------------------|--------------|---------------------|-----------------------|
| Ossila Ltd.                             | UK          | Materials                | established  | 2013                | company               |
| Power Roll Ltd                          | UK          | Solar Modules            | early stage  | 2015                | company               |
| Oxford PV                               | UK, Germany | Solar Modules            | early stage  | 2012                | company               |
| American Perovskites                    | USA         | Materials                | early stage  | n/a                 | public information    |
| Ascent Solar Technologies Inc.          | USA         | Solar Modules            | established  | n/a                 | public information    |
| Beyond Silicon                          | USA         | Solar Modules            | early stage  | 2021                | company               |
| BlueDot Photonics Inc.                  | USA         | Materials, Solar Modules | early stage  | 2020                | company               |
| Caelux Corporation                      | USA         | Solar Modules            | early stage  | 2017                | company               |
| CubicPV Technologies Inc.               | USA         | Solar Modules            | early stage  | 2013                | company               |
| Energy Materials Corp.                  | USA         | Solar Modules            | early stage  | n/a                 | public information    |
| First Solar Inc.                        | USA         | Solar Modules            | established  | n/a                 | public information    |
| FUJIFILM Wako Pure Chemical Corporation | USA         | Materials                | established  | n/a                 | public information    |
| Kurt J. Lesker Company                  | USA         | Machinery                | established  | 2014                | company               |
| MujiElectric                            | USA         | Solar Modules            | early stage  | n/a                 | public information    |
| nTact                                   | USA         | Machinery                | established  | n/a                 | company               |
| PEROTECH Inc.                           | USA         | Solar Modules            | early stage  | 2018                | company               |
| Swift Solar Inc.                        | USA         | Solar Modules            | early stage  | 2018                | company               |
| TandemPV Inc.                           | USA         | Solar Modules            | early stage  | 2016                | company               |
| Verde Technologies                      | USA         | Solar Modules            | early stage  | 2021                | public information    |

## Collection of Industry Information from Publicly Available Sources

The following section gives an overview on how information about activities in the perovskite field as well as employed deposition methods have been collected for companies that did not respond to or decided not to participate in the industry survey.

***Halocell (Australia):*** The company homepage of Halocell states activities in the field of perovskite PV.<sup>159</sup> The company is active in the fabrication of solar modules for internet-of-things applications and was founded in 2019 according to its LinkedIn profile.<sup>160</sup> No information about the employed deposition technique is disclosed. However, the fact that most employees of Halocell seem to have been transferred from Greatcell Energy Pty. Ltd. indicates a primary focus on solution-based methods.

***BOE Technology Group Co. Ltd. (China):*** The company has announced in 2023 to start working on the development of perovskite solar cells. No further information could be collected.

***Borun New Material Technology Ltd. (China):*** The homepage of the company indicates activities in the manufacturing of materials for perovskite-based solar cells.<sup>161</sup> No further information could be collected. The fact that the company acts as a materials supplier indicates a focus on no specific deposition method.

***BYD Co. Ltd. (China):*** The company has announced in 2023 to start working on the development of perovskite solar cells.<sup>162</sup> No further information could be collected.

***Fangsheng Optoelectronics Equipment & Technology Co. Ltd. (China):*** The company presented at the “5<sup>th</sup> Perovskite, Heterojunction & Tandem Cell Forum 2023” in Changzhou and disclosed working on the development of vapor equipment for perovskite-based materials.

***Infi-Solar (China):*** The company presented at the “5<sup>th</sup> Perovskite, Heterojunction & Tandem Cell Forum 2023” in Changzhou and disclosed working on the development of perovskite solar modules employing vapor- and solution-based methods since 2022.

***Renshine Solar Co. Ltd. (China):*** The company presented at the “34<sup>th</sup> International Photovoltaic Science and Engineering Conference (PVSEC)” in Shenzhen and disclosed working on the development of solution-processed perovskite solar cells since 2021.

***Shengcheng Solar Equipment Co. Ltd. (China):*** The company presented at the “5<sup>th</sup> Perovskite, Heterojunction & Tandem Cell Forum 2023” in Changzhou and disclosed working on the development of vapor equipment for perovskite-based materials since 2021.

***Tongwei Solar (China):*** The company presented at the “5<sup>th</sup> Perovskite, Heterojunction & Tandem Cell Forum 2023” in Changzhou and disclosed working on the development of perovskite solar modules employing vapor- and solution-based methods.

***infinityPV ApS (Denmark):*** The company is advertising deposition equipment and inks for organic and perovskite PV on its homepage. The focus is on solution-based roll-to-roll deposition.<sup>163</sup> No further information could be collected.

***Riber (France):*** The homepage of the company states activities in the field of perovskite-based materials.<sup>164</sup> Its focus is on the development of equipment for the vapor phase deposition.

***VOLTEC Solar (France):*** In a press release in 2022, VOLTEC Solar and the Institut Photovoltaïque d’Île-de-France (IPVF) announced to work jointly on the development of perovskite-based tandem solar cells.<sup>165</sup> No additional information could be collected.

***3GSolar Photovoltaics Ltd. (Israel):*** According to its homepage, the company is specialized on the development of solar modules for internet-of-things applications and works on dye-sensitized and perovskite solar cells.<sup>166</sup> A project with the Nokia Corporation highlights the focus of the company on solution-based deposition.<sup>167</sup>

***AISIN SEIKI Co. Ltd. (Japan):*** Annual business reports of the company state activities in the field of perovskite-based PV.<sup>168</sup> A conference contribution at the “nanoGe Conference” in Kyoto in 2019 indicates that the company is working on the solution-based deposition of perovskite solar modules.<sup>169</sup>

***Mitsubishi Chemical Corporation (Japan):*** The company is involved in a Green Innovation Fund project to commercialize perovskite-based solar cells.<sup>170</sup> The company is focused on the supply of materials in this project that appears to be focused on solution-processed perovskite solar cells given the involvement of the project partner EneCoat Technologies Co. Ltd. that has a background in solution-based fabrication methods.

***Sekisui Chemical Co. Ltd. (Japan):*** The company announced to work on the development of roll-to-roll fabricated perovskite solar cells.<sup>171</sup> Published images and videos of process equipment indicate a focus on solution-based methods.<sup>172</sup>

***Sharp Energy Solutions Corporation (Japan):*** In recent press release, the company announced to be working on perovskite-based solar cells.<sup>173</sup> No additional information could be collected.

***Toshiba Corporation (Japan):*** In a press release, the company announced to work on solution processed perovskite solar cells.<sup>174</sup>

***Renewable Energy Corporation (Norway):*** In a very recent press release, the company announced to work on perovskite-based photovoltaics.<sup>175</sup> No additional information could be collected given the recent nature of the company's decision.

***Hanwha Q CELLS Co. Ltd. (South Korea):*** The company is the key industrial partner in a European research project with the goal to establish a pilot production line for the fabrication of perovskite-based tandem solar cells.<sup>176</sup> The research project involves partners with a focus on solution- and vapor-based deposition methods indicating a tendency of the company to explore both methods.

***Sunic System Co. Ltd. (South Korea):*** A recent job posting of the company indicates that it is expanding its experience in the direction of perovskite-based materials.<sup>177</sup> According to the homepage of the company, its general focus is on the development of vapor deposition equipment for thin-film technologies, indicating a focus on vapor processing also for perovskite materials.<sup>178</sup>

***UniTest Inc. (South Korea):*** A press release states that the company is licensing technologies for the fabrication of perovskite-based tandem solar cells from the Korean Research Institute of Chemical Technology (KRICT) in 2015.<sup>179</sup> The latter has a nearly exclusive focus on solution-based deposition methods, indicating that the company is looking into these methods too. Furthermore, a recent job posting of the company is looking for candidate for the development of vapor processes for the deposition of perovskite absorbers.<sup>180</sup> Therefore, the company is believed to pursue both methods.

***FrontMaterials Co. Ltd. (Taiwan):*** The homepage of the company indicates activities in the manufacturing of materials for perovskite-based solar cells.<sup>181</sup> No further information could be collected. The fact that the company acts as a materials supplier indicates a focus on no specific deposition method.

***Kingyoun Optoelectronics Co. Ltd. (Taiwan):*** The homepage of the partner company Taiwan Perovskite Solar Corp. indicates activities in the manufacturing of vacuum equipment for the fabrication of perovskite-based solar cells.<sup>182</sup> No further information could be collected.

***Taiwan Perovskite Solar Corp. (Taiwan):*** The homepage of the company, which was founded in 2021, indicates activities in the manufacturing of perovskite-based solar cells.<sup>182</sup> The homepage highlights the development of non-toxic perovskite precursor solution pointing into the direction of solution processing of perovskite materials. No further information could be collected.

***G24 Power Limited (United Kingdom):*** A research publication from 2016 states that the company is working on the commercialization of perovskite solar cells with a focus on solution-based fabrication methods.<sup>183</sup> No further information about the company could be collected.

***American Perovskites (United States):*** The early-stage company distributes materials for both vapor and solution processing.<sup>162</sup> No further information about the company could be collected.

***Ascent Solar Technologies Inc. (United States):*** The company recently announced to establish the “Ascent Solar Perovskites Center of Excellence” for the commercialization of perovskite solar cells in the United States.<sup>184</sup> The historic background of the company is mostly on vapor phase deposition and also for perovskite materials the published images of the production facilities indicate a focus on vapor phase deposition.

***Energy Materials Corp. (United States):*** The homepage of the company mentions its activities in the field of perovskite materials as well as its focus on solution-based coating methods.<sup>185</sup> The company is employing printing methods and equipment originally developed by the Eastman Kodak Company.<sup>186</sup>

**First Solar Inc. (United States):** The company recently acquired the Swedish manufacturer for vapor deposition equipment EVOLAR AB, proofing its activities in the perovskite field and the strong focus on vapor phase deposition.<sup>187</sup> Furthermore, the company owns patents on vapor phase deposition of perovskite materials.<sup>188</sup> Nevertheless, it cannot be excluded that the company also works on solution processing of perovskite materials. Several recent job postings (not available online anymore) highlighted the search for candidates with experience in solution processing and the close connection between the company and the National Renewable Energy laboratory (NREL) with its focus on solution processing indicates that solution processing is at least explored in parallel.<sup>189,190</sup>

**FUJIFILM Wako Pure Chemical Corporation (United States):** The homepage of the company states activities in the supply of materials for perovskite-based solar cells.<sup>191</sup> No further information could be collected. The fact that the company acts as a materials supplier indicates a focus on no specific deposition method.

**MujiElectric (United States):** An award application of the company states its activities in the development of perovskite solar cells as well as the licensing of technology developed by the National Renewable Energy Laboratory (NREL).<sup>192</sup> Given the fact that, to the author's best knowledge, NREL does not have any publications on vapor processing, the licensing is likely relying on solution processing and the company therefore believed to work exclusively on this method.

**Verde Technologies (United States):** The homepage of the company states its activities in the development of perovskite solar cells since 2021.<sup>193</sup> The images of solution deposition equipment on the homepage indicate an exclusive focus on these methods.

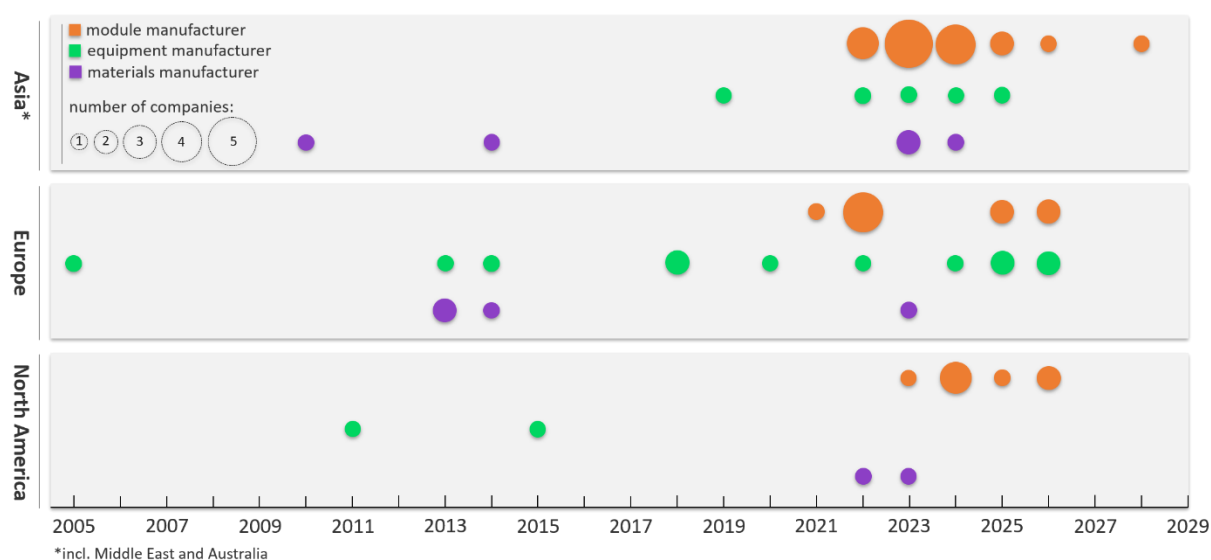

**Fig. S3 | Anticipated commercialization dates of industrial manufacturing of perovskite PV and related business sectors.** Listed are only the commercialization dates that have been disclosed by companies that participated in the industry survey (see Table S5 in the Supporting Information). The industry survey was performed between 2021 and 2023.

## References

1. Li, C. *et al.* Low-bandgap mixed tin–lead iodide perovskites with reduced methylammonium for simultaneous enhancement of solar cell efficiency and stability. *Nat. Energy* **5**, 768–776 (2020).
2. Igual-Muñoz, A. M., Ávila, J., Boix, P. P. & Bolink, H. J. FAPb<sub>0.5</sub>Sn<sub>0.5</sub>I<sub>3</sub>: A Narrow Bandgap Perovskite Synthesized through Evaporation Methods for Solar Cell Applications. *Sol. RRL* **4**, 1–5 (2020).
3. Li, N. *et al.* Engineering the Hole Extraction Interface Enables Single-Crystal MAPbI<sub>3</sub> Perovskite Solar Cells with Efficiency Exceeding 22% and Superior Indoor Response. *Adv. Energy Mater.* **12**, 2103241 (2022).
4. Pérez-Del-Rey, D., Boix, P. P., Sessolo, M., Hadipour, A. & Bolink, H. J. Interfacial Modification for High-Efficiency Vapor-Phase-Deposited Perovskite Solar Cells Based on a Metal Oxide Buffer Layer. *J. Phys. Chem. Lett.* **9**, 1041–1046 (2018).
5. Min, H. *et al.* Perovskite solar cells with atomically coherent interlayers on SnO<sub>2</sub> electrodes. *Nature* **598**, 44–450 (2021).
6. National Renewable Energy Laboratory (NREL). Best Research-Cell Efficiency Chart. (2023). Available at: <https://www.nrel.gov/pv/cell-efficiency.html>.
7. Borchert, J. *et al.* Large-Area, Highly Uniform Evaporated Formamidinium Lead Triiodide Thin Films for Solar Cells. (2017).
8. Gharibzadeh, S. *et al.* Two birds with one stone: Dual grain-boundary and interface passivation enables >22% efficient inverted methylammonium-free perovskite solar cells. *Energy Environ. Sci.* **14**, 5875–5893 (2021).
9. Li, H. *et al.* Sequential vacuum-evaporated perovskite solar cells with more than 24 % efficiency. *Sci. Adv.* **8**, 1–9 (2022).
10. Xu, K. *et al.* Slot-Die Coated Triple-Halide Perovskites for Efficient and Scalable Perovskite/Silicon Tandem Solar Cells. *ACS Energy Lett.* **7**, 3600–3611 (2022).
11. Chiang, Y. *et al.* Vacuum-Deposited Wide-Bandgap Perovskite for All-Perovskite Tandem Solar Cells. *ACS Energy Lett.* **8**, 2728–2737 (2023).
12. Lou, Q. *et al.*  $\pi$ -Conjugated Small Molecules Modified SnO<sub>2</sub> Layer for Perovskite Solar Cells with over 23% Efficiency. *Adv. Energy Mater.* **11**, 1–10 (2021).
13. Gil-Escrig, L. *et al.* Vacuum Deposited Triple-Cation Mixed-Halide Perovskite Solar Cells. *Adv. Energy Mater.* **8**, 1–6 (2018).
14. Wang, S. *et al.* Surface n-type band bending for stable inverted CsPbI<sub>3</sub> perovskite solar cells with over 20% efficiency. *Energy Environ. Sci.* (2023).

15. Becker, P. *et al.* Low Temperature Synthesis of Stable  $\gamma$ -CsPbI<sub>3</sub> Perovskite Layers for Solar Cells Obtained by High Throughput Experimentation. *Adv. Energy Mater.* **9**, 16–19 (2019).
16. Guo, Z. *et al.* Dopant-Free Polymer HTM-Based CsPbI<sub>2</sub>Br Solar Cells with Efficiency Over 17% in Sunlight and 34% in Indoor Light. *Adv. Funct. Mater.* **31**, 4–6 (2021).
17. Abzieher, T. *et al.* Continuous Flash Sublimation of Inorganic Halide Perovskites: Overcoming Rate and Continuity Limitations of Vapor Deposition. *submitted* (2023).
18. Duan, J., Zhao, Y., Wang, Y., Yang, X. & Tang, Q. Hole-Boosted Cu(Cr,M)O<sub>2</sub> Nanocrystals for All-Inorganic CsPbBr<sub>3</sub> Perovskite Solar Cells. *Angew. Chemie* **131**, 16293–16297 (2019).
19. Tong, G. *et al.* Phase transition induced recrystallization and low surface potential barrier leading to 10.91%-efficient CsPbBr<sub>3</sub> perovskite solar cells. *Nano Energy* **65**, 104015 (2019).
20. Liu, M., Johnston, M. B. & Snaith, H. J. Efficient Planar Heterojunction Perovskite Solar Cells by Vapour Deposition. *Nature* **501**, 395–398 (2013).
21. Leyden, M. R. *et al.* High performance perovskite solar cells by hybrid chemical vapor deposition. *J. Mater. Chem. A* **2**, 18742–18745 (2014).
22. Chen, C.-W. *et al.* Efficient and Uniform Planar-Type Perovskite Solar Cells by Simple Sequential Vacuum Deposition. *Adv. Mater.* **26**, 6647–6652 (2014).
23. Ono, L. K., Wang, S., Kato, Y., Raga, S. R. & Qi, Y. Fabrication of semi-transparent perovskite films with centimeter-scale superior uniformity by the hybrid deposition method. *Energy Environ. Sci.* **7**, 3989–3993 (2014).
24. Roldán-Carmona, C. *et al.* Flexible high efficiency perovskite solar cells. *Energy Environ. Sci.* **7**, 994–997 (2014).
25. Momblona, C. *et al.* Efficient methylammonium lead iodide perovskite solar cells with active layers from 300 to 900 nm. *APL Mater.* **2**, 081504 (2014).
26. Malinkiewicz, O. *et al.* Perovskite solar cells employing organic charge-transport layers. *Nat. Photonics* **8**, 128–132 (2014).
27. Malinkiewicz, O. *et al.* Metal-Oxide-Free Methylammonium Lead Iodide Perovskite-Based Solar Cells: The Influence of Organic Charge Transport Layers. *Adv. Energy Mater.* **4**, 1–9 (2014).
28. Polander, L. E. *et al.* Hole-transport material variation in fully vacuum deposited perovskite solar cells. *APL Mater.* **2**, 1–6 (2014).
29. Ng, T. W., Chan, C. Y., Lo, M. F., Guan, Z. Q. & Lee, C. S. Formation chemistry of

- perovskites with mixed iodide/chloride content and the implications on charge transport properties. *J. Mater. Chem. A* **3**, 9081–9085 (2015).
30. Subbiah, A. S. *et al.* Inorganic hole conducting layers for perovskite-based solar cells. *J. Phys. Chem. Lett.* **5**, 1748–1753 (2014).
  31. Hu, H. *et al.* Vapour-based processing of hole-conductor-free CH<sub>3</sub>NH<sub>3</sub>PbI<sub>3</sub> perovskite/C<sub>60</sub> fullerene planar solar cells. *RSC Adv.* **4**, 28964–28967 (2014).
  32. Gao, C. *et al.* Formation of organic-inorganic mixed halide perovskite films by thermal evaporation of PbCl<sub>2</sub> and CH<sub>3</sub>NH<sub>3</sub>I compounds. *RSC Adv.* **5**, 26175–26180 (2015).
  33. Ke, W. *et al.* Efficient fully-vacuum-processed perovskite solar cells using copper phthalocyanine as hole selective layers. *J. Mater. Chem. A* **3**, 23888–23894 (2015).
  34. Lin, Q. *et al.* Electro-optics of perovskite solar cells. *Nat. Photonics* **9**, 106–112 (2014).
  35. Abbas, H. A. *et al.* High efficiency sequentially vapor grown n-i-p CH<sub>3</sub>NH<sub>3</sub>PbI<sub>3</sub> perovskite solar cells with undoped P3HT as p-type heterojunction layer. *APL Mater.* **3**, (2015).
  36. Teuscher, J., Ulianov, A., Müntener, O., Grätzel, M. & Tétreault, N. Control and Study of the Stoichiometry in Evaporated Perovskite Solar Cells. *ChemSusChem* **8**, 3847–3852 (2015).
  37. Wang, S. *et al.* Smooth perovskite thin films and efficient perovskite solar cells prepared by the hybrid deposition method. *J. Mater. Chem. A* **3**, 14631–14641 (2015).
  38. Tavakoli, M. M. *et al.* Fabrication of efficient planar perovskite solar cells using a one-step chemical vapor deposition method. *Sci. Rep.* **5**, 1–9 (2015).
  39. Leyden, M. R., Lee, M. V., Raga, S. R. & Qi, Y. Large formamidinium lead trihalide perovskite solar cells using chemical vapor deposition with high reproducibility and tunable chlorine concentrations. *J. Mater. Chem. A* **3**, 16097–16103 (2015).
  40. Luo, P. *et al.* Uniform, stable, and efficient planar-heterojunction perovskite solar cells by facile low-pressure chemical vapor deposition under fully open-air conditions. *ACS Appl. Mater. Interfaces* **7**, 2708–2714 (2015).
  41. Kim, B.-S., Kim, T.-M., Choi, M.-S., Shim, H.-S. & Kim, J.-J. Fully vacuum-processed perovskite solar cells with high open circuit voltage using MoO<sub>3</sub>/NPB as hole extraction layers. *Org. Electron.* **17**, 102 (2015).
  42. Yang, D. *et al.* Alternating precursor layer deposition for highly stable perovskite films towards efficient solar cells using vacuum deposition. *J. Mater. Chem. A* **3**, 9401–9405 (2015).
  43. Ng, A. *et al.* Efficiency enhancement by defect engineering in perovskite photovoltaic

- cells prepared using evaporated PbI<sub>2</sub>/CH<sub>3</sub>NH<sub>3</sub>I multilayers. *J. Mater. Chem. A* **3**, 9223–9231 (2015).
44. Longo, G., Gil-Escrig, L., Degen, M. J., Sessolo, M. & Bolink, H. J. Perovskite solar cells prepared by flash evaporation. *Chem. Commun.* **51**, 7376–7378 (2015).
  45. Yu, Y. *et al.* Thermally evaporated methylammonium tin triiodide thin films for lead-free perovskite solar cell fabrication. *RSC Adv.* **6**, 90248–90254 (2016).
  46. Zhao, D. *et al.* Annealing-free efficient vacuum-deposited planar perovskite solar cells with evaporated fullerenes as electron-selective layers. *Nano Energy* **19**, 88–97 (2016).
  47. Leyden, M. R., Jiang, Y. & Qi, Y. Chemical vapor deposition grown formamidinium perovskite solar modules with high steady state power and thermal stability. *J. Mater. Chem. A* **4**, 13125–13132 (2016).
  48. Hsiao, S. Y. *et al.* Efficient All-Vacuum Deposited Perovskite Solar Cells by Controlling Reagent Partial Pressure in High Vacuum. *Adv. Mater.* **28**, 7013–7019 (2016).
  49. Kim, B. S., Choi, M. H., Choi, M. S. & Kim, J. J. Composition-controlled organometal halide perovskite Via CH<sub>3</sub>NH<sub>3</sub>I pressure in a vacuum co-deposition process. *J. Mater. Chem. A* **4**, 5663–5668 (2016).
  50. Momblona, C. *et al.* Efficient vacuum deposited p-i-n and n-i-p perovskite solar cells employing doped charge transport layers. *Energy Environ. Sci.* **9**, 3456–3463 (2016).
  51. Fan, P. *et al.* High-performance perovskite CH<sub>3</sub> NH<sub>3</sub> PbI<sub>3</sub> thin films for solar cells prepared by single-source physical vapour deposition. *Sci. Rep.* **6**, 1–9 (2016).
  52. Xu, H. *et al.* Grain growth study of perovskite thin films prepared by flash evaporation and its effect on solar cell performance. *RSC Adv.* **6**, 48851–48857 (2016).
  53. Forgács, D. *et al.* Efficient Monolithic Perovskite/Perovskite Tandem Solar Cells. *Adv. Energy Mater.* **7**, 1–6 (2017).
  54. Patel, J. B. *et al.* Influence of Interface Morphology on Hysteresis in Vapor-Deposited Perovskite Solar Cells. *Adv. Electron. Mater.* **3**, 1–6 (2017).
  55. Zhu, X. *et al.* Superior stability for perovskite solar cells with 20% efficiency using vacuum co-evaporation. *Nanoscale* **9**, 12316–12323 (2017).
  56. Tavakoli, M. M., Simchi, A., Mo, X. & Fan, Z. High-quality organohalide lead perovskite films fabricated by layer-by-layer alternating vacuum deposition for high efficiency photovoltaics. *Mater. Chem. Front.* **1**, 1520–1525 (2017).
  57. Cojocaru, L. *et al.* Detailed Investigation of Evaporated Perovskite Absorbers with High Crystal Quality on Different Substrates. *ACS Appl. Mater. Interfaces* **10**, 26293–

- 26302 (2018).
58. Longo, G. *et al.* Fully Vacuum-Processed Wide Band Gap Mixed-Halide Perovskite Solar Cells. *ACS Energy Lett.* **3**, 214–219 (2018).
  59. Luo, L. *et al.* Large-area perovskite solar cells with  $\text{Cs}_x\text{FA}_{1-x}\text{PbI}_3\text{--yBr}_y$  thin films deposited by a vapor-solid reaction method. *J. Mater. Chem. A* **6**, 21143–21148 (2018).
  60. Tai, M. *et al.* Laser-Induced Flash-Evaporation Printing  $\text{CH}_3\text{NH}_3\text{PbI}_3$  Thin Films for High-Performance Planar Solar Cells. *ACS Appl. Mater. Interfaces* **10**, 26206–26212 (2018).
  61. Abzieher, T. *et al.* Electron-Beam-Evaporated Nickel Oxide Hole Transport Layers for Perovskite-Based Photovoltaics. *Adv. Energy Mater.* **9**, 1–13 (2019).
  62. Abzieher, T. *et al.* Efficient All-Evaporated pin-Perovskite Solar Cells: A Promising Approach Toward Industrial Large-Scale Fabrication. *IEEE J. Photovoltaics* **9**, 1249–1257 (2019).
  63. Borchert, J. *et al.* Impurity Tracking Enables Enhanced Control and Reproducibility of Hybrid Perovskite Vapor Deposition. *ACS Appl. Mater. Interfaces* **11**, 28851–28857 (2019).
  64. Qiu, L. *et al.* Hybrid chemical vapor deposition enables scalable and stable Cs-FA mixed cation perovskite solar modules with a designated area of 91.8 cm<sup>2</sup> approaching 10% efficiency. *J. Mater. Chem. A* **7**, 6920–6929 (2019).
  65. La-Placa, M. G. *et al.* Vacuum-Deposited 2D/3D Perovskite Heterojunctions. *ACS Energy Lett.* **4**, 2893–2901 (2019).
  66. Kottokkaran, R., Gaonkar, H. A., Abbas, H. A., Noack, M. & Dalal, V. Performance and stability of co-evaporated vapor deposited perovskite solar cells. *J. Mater. Sci. Mater. Electron.* **30**, 5487–5494 (2019).
  67. Ball, J. M. *et al.* Dual-Source Coevaporation of Low-Bandgap  $\text{FA}_{1-x}\text{Cs}_x\text{Sn}_{1-y}\text{Pb}_y\text{I}_3$  Perovskites for Photovoltaics. *ACS Energy Lett.* **4**, 2748–2756 (2019).
  68. Pérez-Del-Rey, D. *et al.* Molecular Passivation of  $\text{MoO}_3$ : Band Alignment and Protection of Charge Transport Layers in Vacuum-Deposited Perovskite Solar Cells. *Chem. Mater.* **31**, 6945–6949 (2019).
  69. Palazon, F. *et al.* Room-Temperature Cubic Phase Crystallization and High Stability of Vacuum-Deposited Methylammonium Lead Triiodide Thin Films for High-Efficiency Solar Cells. *Adv. Mater.* **31**, (2019).
  70. Kiermasch, D. *et al.* Unravelling steady-state bulk recombination dynamics in thick efficient vacuum-deposited perovskite solar cells by transient methods. *J. Mater.*

- Chem. A* **7**, 14712–14722 (2019).
71. Lin, D. *et al.* Stable and scalable 3D-2D planar heterojunction perovskite solar cells via vapor deposition. *Nano Energy* **59**, 619–625 (2019).
  72. Hoerantner, M. T. *et al.* High-Speed Vapor Transport Deposition of Perovskite Thin Films. *ACS Appl. Mater. Interfaces* **11**, 32928–32936 (2019).
  73. Arivazhagan, V. *et al.* Vacuum co-deposited CH<sub>3</sub>NH<sub>3</sub>PbI<sub>3</sub> films by controlling vapor pressure for efficient planar perovskite solar cells. *Sol. Energy* **181**, 339–344 (2019).
  74. Tavakoli, M. M., Yadav, P., Prochowicz, D., Tavakoli, R. & Saliba, M. Multilayer evaporation of MAFAPbI<sub>3</sub>-xCl<sub>x</sub> for the fabrication of efficient and large-scale device perovskite solar cells. *J. Phys. D: Appl. Phys.* **52**, (2019).
  75. Peng, H. *et al.* Solar Cells Prepared by Single-Source Thermal. (2019).
  76. Zheng, Z. H. *et al.* Single Source Thermal Evaporation of Two-dimensional Perovskite Thin Films for Photovoltaic Applications. *Sci. Rep.* **9**, 1–9 (2019).
  77. Momblona, C. *et al.* Co-evaporation as an optimal technique towards compact methylammonium bismuth iodide layers. *Sci. Rep.* **10**, 1–8 (2020).
  78. Qiu, L. *et al.* Rapid hybrid chemical vapor deposition for efficient and hysteresis-free perovskite solar modules with an operation lifetime exceeding 800 hours. *J. Mater. Chem. A* **8**, 23404–23412 (2020).
  79. Ngqoloda, S. *et al.* Air-Stable Hybrid Perovskite Solar Cell by Sequential Vapor Deposition in a Single Reactor. *ACS Appl. Energy Mater.* **3**, 2350–2359 (2020).
  80. Hellmann, T. *et al.* The Electronic Structure of MAPI-Based Perovskite Solar Cells: Detailed Band Diagram Determination by Photoemission Spectroscopy Comparing Classical and Inverted Device Stacks. *Adv. Energy Mater.* **10**, (2020).
  81. Patel, J. B. *et al.* Light Absorption and Recycling in Hybrid Metal Halide Perovskite Photovoltaic Devices. *Adv. Energy Mater.* **10**, 1903653 (2020).
  82. Harding, A. J. *et al.* The growth of methylammonium lead iodide perovskites by close space vapor transport. *RSC Adv.* **10**, 16125–16131 (2020).
  83. Lohmann, K. B. *et al.* Control over Crystal Size in Vapor Deposited Metal-Halide Perovskite Films. *ACS Energy Lett.* **5**, 710–717 (2020).
  84. Suwa, K. *et al.* Vapor-Phase Formation of a Hole-Transporting Thiophene Polymer Layer for Evaporated Perovskite Solar Cells. *ACS Appl. Mater. Interfaces* **12**, 6496–6502 (2020).
  85. Li, J. *et al.* Design of Perovskite Thermally Co-Evaporated Highly Efficient Mini-Modules with High Geometrical Fill Factors. *Sol. RRL* **4**, 1–8 (2020).

86. Roß, M. *et al.* Co-Evaporated p-i-n Perovskite Solar Cells beyond 20% Efficiency: Impact of Substrate Temperature and Hole-Transport Layer. *ACS Appl. Mater. Interfaces* **12**, 39261–39272 (2020).
87. Gil-Escrig, L. *et al.* Efficient vacuum-deposited perovskite solar cells with stable cubic FA1- xMAxPbI3. *ACS Energy Lett.* **5**, 3053–3061 (2020).
88. Babaei, A. *et al.* Preparation and Characterization of Mixed Halide MAPbI3–xClx Perovskite Thin Films by Three-Source Vacuum Deposition. *Energy Technol.* **8**, 1–5 (2020).
89. Kim, B. S., Gil-Escrig, L., Sessolo, M. & Bolink, H. J. Deposition Kinetics and Compositional Control of Vacuum-Processed CH3NH3PbI3 Perovskite. *J. Phys. Chem. Lett.* **11**, 6852–6859 (2020).
90. Li, J. *et al.* Highly Efficient Thermally Co-evaporated Perovskite Solar Cells and Mini-modules. *Joule* **4**, 1035–1053 (2020).
91. Zaroni, K. P. S. *et al.* Use of Hydrogen Molybdenum Bronze in Vacuum-Deposited Perovskite Solar Cells. *Energy Technol.* **8**, 1–4 (2020).
92. Babaei, A. *et al.* Efficient Vacuum Deposited P-I-N Perovskite Solar Cells by Front Contact Optimization. *Front. Chem.* **7**, 1–6 (2020).
93. Chiang, Y. H., Anaya, M. & Stranks, S. D. Multisource Vacuum Deposition of Methylammonium-Free Perovskite Solar Cells. *ACS Energy Lett.* **5**, 2498–2504 (2020).
94. Ji, R. *et al.* Thermally evaporated methylammonium-free perovskite solar cells. *J. Mater. Chem. C* **8**, 7725–7733 (2020).
95. Lei, T. *et al.* Flexible Perovskite Solar Modules with Functional Layers Fully Vacuum Deposited. *Sol. RRL* **2000292**, 1–9 (2020).
96. Tavakoli, M. M. & Tavakoli, R. All-Vacuum-Processing for Fabrication of Efficient, Large-Scale, and Flexible Inverted Perovskite Solar Cells. *Phys. Status Solidi - Rapid Res. Lett.* **15**, (2021).
97. Tavakoli, M. M., Yadav, P., Prochowicz, D. & Tavakoli, R. Efficient, Hysteresis-Free, and Flexible Inverted Perovskite Solar Cells Using All-Vacuum Processing. *Sol. RRL* **5**, (2021).
98. Smecca, E. *et al.* Two-step MAPbI3 deposition by low-vacuum proximity-space-effusion for high-efficiency inverted semitransparent perovskite solar cells. *J. Mater. Chem. A* **9**, 16456–16469 (2021).
99. Heinze, K. L. *et al.* Importance of methylammonium iodide partial pressure and evaporation onset for the growth of co-evaporated methylammonium lead iodide

- absorbers. *Sci. Rep.* **11**, 1–12 (2021).
100. Sahli, F. *et al.* Vapor Transport Deposition of Methylammonium Iodide for Perovskite Solar Cells. *ACS Appl. Energy Mater.* **4**, 4333–4343 (2021).
  101. Choi, Y. *et al.* Toward All-Vacuum-Processable Perovskite Solar Cells with High Efficiency, Stability, and Scalability Enabled by Fluorinated Spiro-OMeTAD through Thermal Evaporation. *Sol. RRL* **5**, 1–10 (2021).
  102. Li, J. *et al.* Co-Evaporated MAPbI<sub>3</sub> with Graded Fermi Levels Enables Highly Performing, Scalable, and Flexible p-i-n Perovskite Solar Cells. *Adv. Funct. Mater.* **31**, (2021).
  103. Dewi, H. A. *et al.* Excellent Intrinsic Long-Term Thermal Stability of Co-Evaporated MAPbI<sub>3</sub> Solar Cells at 85 °C. *Adv. Funct. Mater.* **31**, (2021).
  104. Paliwal, A. *et al.* Vacuum-Deposited Microcavity Perovskite Photovoltaic Devices. *ACS Photonics* **8**, 2067–2073 (2021).
  105. Susic, I. *et al.* Intrinsic Organic Semiconductors as Hole Transport Layers in p-i-n Perovskite Solar Cells. *Sol. RRL* **6**, (2022).
  106. Gil-Escrig, L. *et al.* Fully Vacuum-Processed Perovskite Solar Cells on Pyramidal Microtextures. *Sol. RRL* **5**, 1–9 (2021).
  107. Klipfel, N. *et al.* Crystallographically Oriented Hybrid Perovskites via Thermal Vacuum Codeposition. *Sol. RRL* **5**, (2021).
  108. Gallet, T. *et al.* Co-evaporation of CH<sub>3</sub>NH<sub>3</sub>PbI<sub>3</sub>: How growth conditions impact phase purity, photostriction, and intrinsic stability. *ACS Appl. Mater. Interfaces* **13**, 2642–2653 (2021).
  109. Roß, M. *et al.* Co-Evaporated Formamidinium Lead Iodide Based Perovskites with 1000 h Constant Stability for Fully Textured Monolithic Perovskite/Silicon Tandem Solar Cells. *Adv. Energy Mater.* **11**, (2021).
  110. Kaya, I. C. *et al.* Crystal Reorientation and Amorphization Induced by Stressing Efficient and Stable P-I-N Vacuum-Processed MAPbI<sub>3</sub> Perovskite Solar Cells. *Adv. Energy Sustain. Res.* **2**, 2000065 (2021).
  111. Feng, J. *et al.* High-throughput large-area vacuum deposition for high-performance formamidinium-based perovskite solar cells. *Energy Environ. Sci.* **14**, 3035–3043 (2021).
  112. Gil-Escrig, L. *et al.* Efficient Wide-Bandgap Mixed-Cation and Mixed-Halide Perovskite Solar Cells by Vacuum Deposition. *ACS Energy Lett.* **6**, 827–836 (2021).
  113. Abzieher, T. *et al.* From Groundwork to Efficient Solar Cells: On the Importance of the Substrate Material in Co-Evaporated Perovskite Solar Cells. *Adv. Funct. Mater.* **31**,

- (2021).
114. Ritzer, D. B. *et al.* Upscaling of perovskite solar modules: The synergy of fully evaporated layer fabrication and all-laser-scribed interconnections. *Prog. Photovoltaics Res. Appl.* **30**, 360–373 (2022).
  115. Lin, D. *et al.* The selection strategy of ammonium-group organic salts in vapor deposited perovskites: From dimension regulation to passivation. *Nano Energy* **84**, 105893 (2021).
  116. Gao, B. *et al.* Organic-Inorganic Perovskite Films and Efficient Planar Heterojunction Solar Cells by Magnetron Sputtering. *Adv. Sci.* **8**, 1–10 (2021).
  117. Susic, I., Gil-Escrig, L., Palazon, F., Sessolo, M. & Bolink, H. J. Quadruple-Cation Wide-Bandgap Perovskite Solar Cells with Enhanced Thermal Stability Enabled by Vacuum Deposition. *ACS Energy Lett.* **7**, 1355–1363 (2022).
  118. Lohmann, K. B. *et al.* Solvent-Free Method for Defect Reduction and Improved Performance of p-i-n Vapor-Deposited Perovskite Solar Cells. *ACS Energy Lett.* 1903–1911 (2022).
  119. Kim, B.-S. *et al.* Simple approach for an electron extraction layer in an all-vacuum processed n-i-p perovskite solar cell. *Energy Adv.* **1**, 252–257 (2022).
  120. Kroll, M. *et al.* Insights into the evaporation behaviour of FAI: material degradation and consequences for perovskite solar cells. *Sustain. Energy Fuels* **6**, 3230–3239 (2022).
  121. Choi, W. G., Lee, S., Jeon, B. C. & Moon, T. Single-source evaporation of CH<sub>3</sub>NH<sub>3</sub>SnI<sub>3</sub> for Pb-free perovskite solar cells. *Int. J. Energy Res.* **46**, 9875–9881 (2022).
  122. Yuan, Q. *et al.* Thermally Stable Perovskite Solar Cells by All-Vacuum Deposition. *ACS Appl. Mater. Interfaces* **15**, 772–781 (2022).
  123. Li, H. *et al.* Molten Salt Strategy for Reproducible Evaporation of Efficient Perovskite Solar Cells. *Adv. Funct. Mater.* **33**, 2211232 (2023).
  124. Soto-Montero, T. *et al.* Single-Source Vapor-Deposition of MA<sub>1-x</sub>FA<sub>x</sub>PbI<sub>3</sub> Perovskite Absorbers for Solar Cells. *Adv. Funct. Mater.* 2300588 (2023).
  125. Soto-Montero, T. *et al.* Single-Source Pulsed Laser Deposited Perovskite Solar Cells with >19% Efficiency. *Preprint* (2023).
  126. Frolova, L. A. *et al.* Highly efficient all-inorganic planar heterojunction perovskite solar cells produced by thermal coevaporation of CsI and PbI<sub>2</sub>. *J. Phys. Chem. Lett.* **8**, 67–72 (2017).

127. Ma, Q., Huang, S., Wen, X., Green, M. A. & Ho-Baillie, A. W. Y. Hole Transport Layer Free Inorganic CsPbI<sub>2</sub>Br<sub>2</sub> Perovskite Solar Cell by Dual Source Thermal Evaporation. *Adv. Energy Mater.* **6**, 2–6 (2016).
128. Moghe, D. *et al.* All vapor-deposited lead-free doped CsSnBr<sub>3</sub> planar solar cells. *Nano Energy* **28**, 469–474 (2016).
129. Yonezawa, K. *et al.* Annealing effects on CsPbI<sub>3</sub>-based planar heterojunction perovskite solar cells formed by vacuum deposition method. *Jpn. J. Appl. Phys.* **56**, 2–6 (2017).
130. Ma, Q. *et al.* The Effect of Stoichiometry on the Stability of Inorganic Cesium Lead Mixed-Halide Perovskites Solar Cells. *J. Phys. Chem. C* **121**, 19642–19649 (2017).
131. Shahiduzzaman, M. *et al.* Improved Reproducibility and Intercalation Control of Efficient Planar Inorganic Perovskite Solar Cells by Simple Alternate Vacuum Deposition of PbI<sub>2</sub> and CsI. *ACS Omega* **2**, 4464–4469 (2017).
132. Hutter, E. M. *et al.* Vapour-Deposited Cesium Lead Iodide Perovskites: Microsecond Charge Carrier Lifetimes and Enhanced Photovoltaic Performance. *ACS Energy Lett.* **2**, 1901–1908 (2017).
133. Chen, C. Y. *et al.* All-Vacuum-Deposited Stoichiometrically Balanced Inorganic Cesium Lead Halide Perovskite Solar Cells with Stabilized Efficiency Exceeding 11%. *Adv. Mater.* **29**, (2017).
134. Chen, M. *et al.* Cesium Titanium(IV) Bromide Thin Films Based Stable Lead-free Perovskite Solar Cells. *Joule* **2**, 558–570 (2018).
135. Lei, J. *et al.* Efficient planar CsPbBr<sub>3</sub> perovskite solar cells by dual-source vacuum evaporation. *Sol. Energy Mater. Sol. Cells* **187**, 1–8 (2018).
136. Kottokkaran, R., Gaonkar, H. A., Bagheri, B. & Dalal, V. L. Efficient p-i-n inorganic CsPbI<sub>3</sub> perovskite solar cell deposited using layer-by-layer vacuum deposition. *J. Vac. Sci. Technol. A* **36**, 041201 (2018).
137. Li, H. *et al.* Interface engineering using a perovskite derivative phase for efficient and stable CsPbBr<sub>3</sub> solar cells. *J. Mater. Chem. A* **6**, 14255–14261 (2018).
138. Park, C.-G., Choi, W.-G., Na, S. & Moon, T. All-Inorganic Perovskite CsPbI<sub>2</sub>Br<sub>2</sub> Through Co-evaporation for Planar Heterojunction Solar Cells. *Electron. Mater. Lett.* **15**, 56–60 (2019).
139. Chen, W. *et al.* A Semitransparent Inorganic Perovskite Film for Overcoming Ultraviolet Light Instability of Organic Solar Cells and Achieving 14.03% Efficiency. *Adv. Mater.* **30**, (2018).

140. Fan, P. *et al.* Single-Source Vapor-Deposited Cs<sub>2</sub>AgBiBr<sub>6</sub> Thin Films for Lead-Free Perovskite Solar Cells. *Nanomaterials* **9**, 1–13 (2019).
141. Chen, T. *et al.* Accelerating hole extraction by inserting 2D Ti<sub>3</sub>C<sub>2</sub>-MXene interlayer to all inorganic perovskite solar cells with long-term stability. *J. Mater. Chem. A* **7**, 20597–20603 (2019).
142. Lin, H. Y. *et al.* Efficient Cesium Lead Halide Perovskite Solar Cells through Alternative Thousand-Layer Rapid Deposition. *Adv. Funct. Mater.* **29**, (2019).
143. Liu, X. *et al.* Sequentially vacuum evaporated high-quality CsPbBr<sub>3</sub> films for efficient carbon-based planar heterojunction perovskite solar cells. *J. Power Sources* **443**, 227269 (2019).
144. Zhang, Y. *et al.* Moisture assisted CsPbBr<sub>3</sub> film growth for high-efficiency, all-inorganic solar cells prepared by a multiple sequential vacuum deposition method. *Mater. Sci. Semicond. Process.* **98**, 39–43 (2019).
145. Tai, M. *et al.* Efficient Inorganic Cesium Lead Mixed-Halide Perovskite Solar Cells Prepared by Flash-Evaporation Printing. *Energy Technol.* **7**, 1–6 (2019).
146. Murata, A. *et al.* Effect of high-temperature post-deposition annealing on cesium lead bromide thin films deposited by vacuum evaporation. *AIP Adv.* **10**, (2020).
147. Li, J. *et al.* Fabrication of efficient CsPbBr<sub>3</sub> perovskite solar cells by single-source thermal evaporation. *J. Alloys Compd.* **818**, (2020).
148. Gaonkar, H. *et al.* Thermally Stable, Efficient, Vapor Deposited Inorganic Perovskite Solar Cells. *ACS Appl. Energy Mater.* **3**, 3497–3503 (2020).
149. Mi, L., Zhang, Y., Chen, T., Xu, E. & Jiang, Y. Carbon electrode engineering for high efficiency all-inorganic perovskite solar cells. *RSC Adv.* **10**, 12298–12303 (2020).
150. Igual-Muñoz, A. M. *et al.* Room-Temperature Vacuum Deposition of CsPbI<sub>2</sub>Br Perovskite Films from Multiple Sources and Mixed Halide Precursors. *Chem. Mater.* **32**, 8641–8652 (2020).
151. Xiang, T. *et al.* Universal defects elimination for high performance thermally evaporated CsPbBr<sub>3</sub> perovskite solar cells. *Sol. Energy Mater. Sol. Cells* **206**, 110317 (2020).
152. Hua, J. *et al.* A pressure-assisted annealing method for high quality CsPbBr<sub>3</sub> film deposited by sequential thermal evaporation. *RSC Adv.* **10**, 8905–8909 (2020).
153. Pintor Monroy, M. I. *et al.* All-Evaporated, All-Inorganic CsPbI<sub>3</sub>Perovskite-Based Devices for Broad-Band Photodetector and Solar Cell Applications. *ACS Appl. Electron. Mater.* **3**, 3023–3033 (2021).

154. Abib, M. H. *et al.* Direct deposition of Sn-doped CsPbBr<sub>3</sub> perovskite for efficient solar cell application. *RSC Adv.* **11**, 3380–3389 (2021).
155. Duan, Y. *et al.* Highly efficient and stable inorganic CsPbBr<sub>3</sub> perovskite solar cells via vacuum co-evaporation. *Appl. Surf. Sci.* **562**, 150153 (2021).
156. Zhu, J. *et al.* Inorganic Perovskite Solar Cells with High Voltage and Excellent Thermal and Environmental Stability. *ACS Appl. Energy Mater.* **5**, 6265–6273 (2022).
157. Liao, Y. *et al.* Performance Enhancement of Evaporated CsPbI<sub>2</sub>Br Perovskite Solar Cells with a CuSCN Hole Transport Layer via a Cesium Bromide Buffer Layer. *ACS Appl. Energy Mater.* **5**, 9542–9548 (2022).
158. Liu, L., Yang, S. E., Liu, P. & Chen, Y. High-quality and full-coverage CsPbBr<sub>3</sub> thin films via electron beam evaporation with post-annealing treatment for all-inorganic perovskite solar cells. *Sol. Energy* **232**, 320–327 (2022).
159. Halocell. Company Homepage. (2023). Available at: <https://halocell.co/>.
160. Halocell. Company LinkedIn Profile. (2023). Available at: <https://www.linkedin.com/company/halocell/>.
161. Borun New Material Technology Ltd. Company Homepage. (2023). Available at: <https://www.chemborun.com/>.
162. American Perovskites. Company Homepage. (2023). Available at: <https://americanperovskites.zohocommerce.com/>.
163. infinityPV ApS. Company Homepage. (2023). Available at: <https://www.infinitypv.com/>.
164. Riber. Company Homepage. (2023). Available at: <https://www.riber.com/>.
165. L’Institut Photovoltaïque d’Île-de-France (IPVF). France PV Industrie: an ambitious photovoltaic industrial project to accelerate the ecological transition in France. (2022). Available at: <https://www.ipvf.fr/les-technologies-de-rupture-developpees-par-ipvf-sont-a-lhonneur-du-fit-book-2022/>.
166. 3GSolar Photovoltaics Ltd. Company Homepage. (2023). Available at: <https://www.3gsolar.com/>.
167. Nokia Corporation. Nokia Partners - Open Communities. (2023). Available at: <https://open-ecosystem.org/partners/3gsolar-photovoltaics-ltd>.
168. Aisin Group. AISIN Group Report 2018. (2018). Available at: [https://www.aisin.com/en/sustainability/report/pdf/aisin\\_ar2018\\_en.pdf](https://www.aisin.com/en/sustainability/report/pdf/aisin_ar2018_en.pdf).
169. Shimizu, T. *et al.* Development of Large Size Perovskite Solar Cells Fabrication Technique by Spray Coating. (2018). Available at:

- <https://www.nanoge.org/proceedings/IPEROP19/5c19fb1aa907b67a1ca15120>.
170. Mitsubishi Chemical Corporation. Participation in NEDO's Green Innovation Fund Project/Development of Next-Generation Solar Cells. (2022). Available at: <https://www.mmc.co.jp/corporate/en/news/2022/news20220125.html>.
  171. Sekisui Chemical Co. Ltd. Film-type Perovskite Solar Cells Installed in Umekita (Osaka) Station. (2022). Available at: [https://www.sekisuichechemical.com/news/2022/1378100\\_38754.html](https://www.sekisuichechemical.com/news/2022/1378100_38754.html).
  172. tv-asahi news. Turning the entire city into a power station with bendable solar cells that can generate electricity even in the rain. (2022). Available at: [https://news.tv-asahi.co.jp/news\\_society/articles/000271217.html](https://news.tv-asahi.co.jp/news_society/articles/000271217.html).
  173. Sharp Energy Solutions Corporation. Sharp to Take Part in CES 2023. (2023). Available at: <https://global.sharp/corporate/news/221213-a.html>.
  174. Toshiba Corporation. Toshiba's Polymer Film-Based Perovskite Large-Area Photovoltaic Module Reaches Record Power Conversion Efficiency of 15.1%. (2021). Available at: <https://www.global.toshiba/ww/technology/corporate/rdc/rd/topics/21/2109-01.html>.
  175. Schultz-Wittmann, O. *et al.* UPSCALING OF PEROVSKITE-SILICON TANDEM SOLAR CELLS. in *8th World Conference on Photovoltaic Energy Conversion* 354–357 (2022).
  176. PEPPERONI Consortium. Pilot Line for European Production of Perovskite-Silicon Tandem Modules on Industrial Scale. (2023). Available at: <https://pepperoni-project.eu/>.
  177. Sunic System Co. Ltd. Job Posting: Perovskite solar cell manufacturing, development of deposition equipment. (2023). Available at: [https://www.saramin.co.kr/zf\\_user/jobs/view?rec\\_idx=45055847](https://www.saramin.co.kr/zf_user/jobs/view?rec_idx=45055847).
  178. Sunic System Co. Ltd. Homepage of Sunic System Co. Ltd. (2023). Available at: <http://sunic.co.kr/eng/home.php?go=main>.
  179. etnews. Chemical Research Institute transfers perovskite solar cell technology to Unitest. (2016). Available at: <https://www.etnews.com/20160830000264>.
  180. Unitest Co. Ltd. Job Posting: Perovskite solar cell development/research experience. (2022). Available at: [https://job.incruit.com/jobdb\\_info/jobpost.asp?job=2209080000209](https://job.incruit.com/jobdb_info/jobpost.asp?job=2209080000209).
  181. FrontMaterials Co. Ltd. Company Homepage. (2023). Available at: <http://www.frontmaterials.com/technology.php>.
  182. Taiwan Perovskite Solar Corp. Kingyoun and TPSC create solutions for third-

- generation solar cells. (2021). Available at: <https://en.tw-perovskite.com/post/kingyoup-and-tpsc-create-solutions-for-third-generation-solar-cells>.
183. Di Giacomo, F., Fakharuddin, A., Jose, R. & Brown, T. M. Progress, challenges and perspectives in flexible perovskite solar cells. *Energy Environ. Sci.* **9**, 3007–3035 (2016).
  184. Ascent Solar Technologies Inc. Company Homepage. (2023). Available at: <https://ascentsolar.com/perovskites>.
  185. Energy Materials Corp. Company Homepage. (2023). Available at: <https://enmatcorp.com/advanced-photovoltaic-material-manufacturing/>.
  186. pv magazine. US start-up pursues roll-to-roll printing of perovskite on flexible glass. (2020). Available at: <https://www.pv-magazine.com/2020/11/18/us-start-up-pursues-roll-to-roll-printing-of-perovskite-on-flexible-glass/>.
  187. First Solar Inc. First Solar Strengthens Global Technology Position in PV with Acquisition of Evolar, a Leading European Thin Film Company. (2023). Available at: <https://investor.firstsolar.com/news/press-release-details/2023/First-Solar-Strengthens-Global-Technology-Position-in-PV-with-Acquisition-of-Evolar-a-Leading-European-Thin-Film-Company/default.aspx>.
  188. Chen, L., Ho, D., Li, X. & Powell, R. Methods for Perovskite Device Processing by Vapor Transport Deposition. (2022).
  189. ReTHINK Research. NREL sees First Solar chasing cheap perovskite printing at scale. (2020). Available at: <https://rethinkresearch.biz/articles/nrel-sees-first-solar-chasing-cheap-perovskite-printing-at-scale/>.
  190. US-MAP Consortium. Ensuring U.S. Leadership in Manufacturing of Next-Generation Photovoltaics and Optoelectronics. (2023). Available at: <https://www.usa-perovskites.org/>.
  191. FUJIFILM Wako Pure Chemical Corporation. Company Homepage. (2023). Available at: <https://labchem-wako.fujifilm.com/us/category/00247.html>.
  192. U.S. Department of Energy. American-Made Challenges: Perovskite Startup Prize. (2023). Available at: <https://www.energy.gov/eere/solar/american-made-challenges-perovskite-startup-prize>.
  193. Verde Technologies. Company Homepage. (2023). Available at: <https://www.verde-technologies.com/>.
